# Supplementary material for: Dynamic self-assembly of molecular capsules via solvent polarity controlled reversible binding of nitrate anions with C3 symmetric tripodal receptors
Source: Royal Society of Chemistry journal article supplement (doi:10.1039/c1cc12757h), 2011-01-01
Supplement: c1cc12757h.pdf [file c1cc12757h.pdf]

Supplementary Information

**Dynamic Self-Assembly of Molecular Capsules *via* Solvent Polarity Controlled Reversible Binding of Nitrate Anion with C<sub>3</sub> Symmetric Tripodal Receptors**

**Ashutosh S. Singh and Shih-Sheng Sun\***

*Institute of Chemistry, Academia Sinica, 115 Nankang, Taipei, Taiwan,  
Republic of China*

*Fax: +011-886-2-27831237*

*Tel: +011-886-2-27898596*

*E-mail: sssun@chem.sinica.edu.tw*

Contents:

|                     |                                                                                                                                                                  |
|---------------------|------------------------------------------------------------------------------------------------------------------------------------------------------------------|
| <b>Fig. S1-S21</b>  | Spectral characterization of receptor <b>1-3</b> and their corresponding anion complexes.                                                                        |
| <b>Fig. S22</b>     | Titration of mixture of nitrate complex <b>1a</b> and <b>1b</b> in DMSO- <i>d</i> <sub>6</sub> with varying amount of CDCl <sub>3</sub> .                        |
| <b>Fig. S23</b>     | Titration of receptor <b>1'</b> in DMSO- <i>d</i> <sub>6</sub> with varying amount of CDCl <sub>3</sub>                                                          |
| <b>Fig. S24</b>     | Concentration-dependent <sup>1</sup> H NMR titration of nitrate complex <b>1b</b> in a mixture solution of DMSO- <i>d</i> <sub>6</sub> /CDCl <sub>3</sub> (1:1). |
| <b>Fig. S25-S28</b> | HRESI mass spectra of nitrate complexes <b>1a-3a</b> and <b>1b</b> .                                                                                             |
| <b>Fig. S29</b>     | HRESI mass spectrum of self-assemble capsule ( <b>1'2</b> )                                                                                                      |
| <b>Fig. S30</b>     | HRESI mass spectrum nitrate anion encapsulated capsule ( <b>1'2a</b> )                                                                                           |
| <b>Table S1</b>     | Crystallographic data and structure refinements for <b>1a</b>                                                                                                    |
| <b>Table S2</b>     | Hydrogen bonding distances and Bond angles in complex <b>1a</b>                                                                                                  |
| <b>Fig. S31</b>     | Details of crystal structure of nitrate complex <b>1a</b>                                                                                                        |

### Synthetic Scheme:

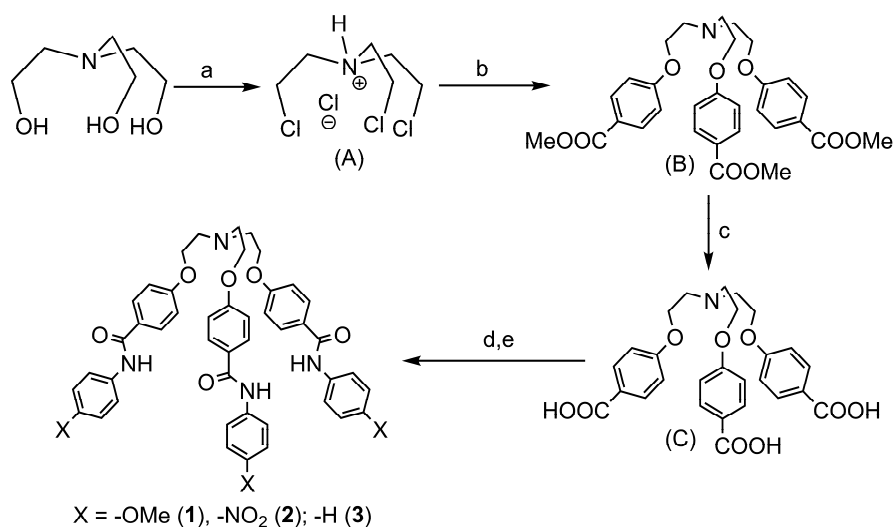

(a) SOCl<sub>2</sub>, CHCl<sub>3</sub>, 54%. (b) *p*-OH-C<sub>6</sub>H<sub>4</sub>COOMe, KOH, DMSO, 80 °C, 75%. (c) 5 N NaOH/MeOH (1:1, v/v), 100 °C, 12 h, dil HCl, 92%. (d) SOCl<sub>2</sub>, CH<sub>2</sub>Cl<sub>2</sub>, DMF (cat.), reflux, 2-3 h. (e) X-C<sub>6</sub>H<sub>4</sub>NH<sub>2</sub>, CH<sub>2</sub>Cl<sub>2</sub>, Et<sub>3</sub>N, reflux, 8 h, 89-95%.

**General procedures for the synthesis of receptors 1–3.** Receptors 1–3 were synthesized from previously reported tris(2-chloroethyl)amine hydrochloride<sup>1</sup> (A) by simple S<sub>N</sub>2 substitution with 4-hydroxy methylbenzoate in DMSO followed by basic hydrolysis to yield corresponding triacid (C). Subsequent condensation of triacid with thionyl chloride in dichloromethane yielded corresponding acid chloride. Subsequently, the acid chloride solution in dichloromethane was slowly added to a mixture of the corresponding amino derivative and Et<sub>3</sub>N in dichloromethane and refluxed for 8-12 h. Solvent was removed under reduced pressure. Ice-cold water was added to the residue and stirred at room temperature for 2-3 h to precipitate the target compounds (1-3). The crude product was purified by flash chromatography with

CHCl<sub>3</sub>/MeOH mixture solution as eluent to yield desired receptors. The desired receptors **1-3** were isolated in 89-95% yields.

**1**: Creamy white solid (yield 95%). <sup>1</sup>H NMR (DMSO-*d*<sub>6</sub>, 400 MHz, 20 °C) δ 3.12 (t, 6H, *J* = 5.6 Hz), 3.73 (s, 9H), 4.18 (t, 6H, *J* = 5.6 Hz), 6.90 (d, 6H, *J* = 8.8 Hz), 7.03 (d, 6H, *J* = 8.8 Hz), 7.65 (d, 6H, *J* = 8.8 Hz), 7.93 (d, 6H, *J* = 8.8 Hz), 9.96 (s, 3H). <sup>13</sup>C NMR (DMSO-*d*<sub>6</sub>, 100 MHz, 20 °C) δ 53.5, 55.2, 66.8, 113.7, 114.1, 122.0, 127.0, 129.4, 132.4, 155.4, 161.0, 164.5. HRESIMS *m/z* 825.3494 (calcd *m/z* 825.3500 for [M+H]<sup>+</sup>).

**1a**: Pale yellow solid (yield 92%). <sup>1</sup>H NMR (DMSO-*d*<sub>6</sub>, 400 MHz, 20 °C) δ 3.74 (s, 9H), 3.92 (s, 6H), 4.57 (s, 6H), 6.92 (d, 6H, *J* = 8.4 Hz), 7.10 (d, 6H, *J* = 8.4 Hz), 7.67 (d, 6H, *J* = 8.4 Hz), 8.00 (d, 6H, *J* = 8.4 Hz), 10.03 (s, 3H). <sup>13</sup>C NMR (DMSO-*d*<sub>6</sub>, 100 MHz, 20 °C) δ 53.4, 55.2, 62.6, 113.7, 114.3, 122.1, 127.9, 129.5, 132.3, 155.5, 160.0, 164.4. HRESIMS *m/z* 886.3306 (calcd *m/z* 886.3299 for [M-H]).

**1b**: Orange color solid (yield 92%). <sup>1</sup>H NMR (DMSO-*d*<sub>6</sub>, 400 MHz, 20 °C) δ 3.86 (s, 9H), 3.92 (s, 6H), 4.58 (s, 6H), 7.15 (d, 6H, *J* = 8.8 Hz), 7.35 (d, 3H, *J* = 9.2 Hz), 7.52 (s, 3H), 7.64 (d, 3H, *J* = 9.2 Hz), 7.98 (d, 6H, *J* = 8.8 Hz) 10.44 (s, 3H). <sup>13</sup>C NMR (DMSO-*d*<sub>6</sub>, 100 MHz, 20 °C) δ 53.3, 56.1, 62.7, 109.2, 114.6, 120.2, 124.5, 126.6,

128.0, 129.7, 143.9, 156.4, 160.5, 164.4. HRESIMS  $m/z$  1021.2855 (calcd  $m/z$  1021.2852 for [M-H]).

**1'**: Deep yellow solid (yield 87%).  $^1\text{H}$  NMR (DMSO- $d_6$ , 400 MHz, 20 °C)  $\delta$  3.13 (t, 6H,  $J = 5.2$  Hz), 3.85 (s, 9H), 4.20 (t, 6H,  $J = 5.2$  Hz), 7.08 (d, 6H,  $J = 8.8$  Hz), 7.33 (d, 3H,  $J = 9$  Hz), 7.51 (s, 3H), 7.65 (d, 3H,  $J = 8.8$  Hz), 7.92 (d, 6H,  $J = 8.8$  Hz), 10.39 (s, 3H).  $^{13}\text{C}$  NMR (DMSO- $d_6$ , 100 MHz, 20 °C)  $\delta$  53.4, 56.0, 66.9, 109.1, 114.3, 120.2, 124.6, 125.7, 127.7, 129.6, 143.6, 156.1, 161.5, 164.6. HRESIMS  $m/z$  960.3060 (calcd  $m/z$  960.3052 for [M+H] $^+$ ).

**2**: Yellow solid (yield 85%).  $^1\text{H}$  NMR (DMSO- $d_6$ , 400 MHz, 20 °C)  $\delta$  3.88 (s, 6H), 4.64 (s, 6H), 7.13 (d, 6H,  $J = 8.4$  Hz), 8.04-8.09 (m, 9H), 8.21 (d, 6H,  $J = 9.2$  Hz), 10.75 (s, 3H).  $^{13}\text{C}$  NMR (DMSO- $d_6$ , 100 MHz, 20 °C)  $\delta$  52.6, 62.7, 114.4, 119.8, 124.6, 126.8, 130.1, 142.2, 145.7, 160.5, 165.3. HRESIMS  $m/z$  870.2730 (calcd  $m/z$  870.2735 for [M+H] $^+$ ).

**2a**: Yellow solid (yield 87%).  $^1\text{H}$  NMR (DMSO- $d_6$ , 400 MHz, 20 °C)  $\delta$  3.93 (s, 6H), 4.58 (s, 6H), 7.13 (d, 6H,  $J = 8.8$  Hz), 8.01-8.05 (m, 9H), 8.22 (d, 6H,  $J = 9.2$  Hz), 10.65 (s, 3 H).  $^{13}\text{C}$  NMR (DMSO- $d_6$ , 100 MHz, 20 °C)  $\delta$  53.4, 62.7, 114.4, 119.8, 124.7, 126.9, 130.0, 142.3, 145.6, 160.5, 165.4. HRESIMS  $m/z$  931.2539 (calcd  $m/z$  931.2535 for [M-H]).



**3**: Creamy white solid (yield 89%).  $^1\text{H}$  NMR (DMSO- $d_6$ , 400 MHz, 20 °C)  $\delta$  3.13 (t, 6H,  $J = 5.6$  Hz), 4.19 (s, 6H,  $J = 5.6$  Hz), 7.07 (m, 9H), 7.33 (3, 6H,  $J = 7.6$  Hz), 7.76 (d, 6H,  $J = 8.0$  Hz), 7.95 (d, 6H,  $J = 8.0$  Hz), 10.07 (s, 3H).  $^{13}\text{C}$  NMR (DMSO- $d_6$ , 100 MHz, 20 °C)  $\delta$  53.6, 66.9, 114.2, 120.5, 123.5, 127.0, 128.6, 129.7, 139.3, 161.2, 165.0. HRESIMS  $m/z$  735.3174 (calcd  $m/z$  735.3183 for  $[\text{M}+\text{H}]^+$ ).

**3a**: Creamy yellow solid (yield 85%).  $^1\text{H}$  NMR (DMSO- $d_6$ , 400 MHz, 20 °C)  $\delta$  3.90 (s, 6H), 4.56 (s, 6H), 7.07-7.13 (m, 9H), 7.34 (t, 6H,  $J = 8.0$  Hz), 7.77 (d, 6H,  $J = 8.0$  Hz), 8.01 (d, 6H,  $J = 8.4$  Hz), 10.12 (s, 3H).  $^{13}\text{C}$  NMR (DMSO- $d_6$ , 100 MHz, 20 °C)  $\delta$  53.4, 62.6, 114.3, 120.5, 123.6, 127.8, 128.6, 129.7, 139.2, 160.1, 164.7. HRESIMS  $m/z$  796.2977 (calcd  $m/z$  796.2983 for  $[\text{M}-\text{H}]^-$ ).

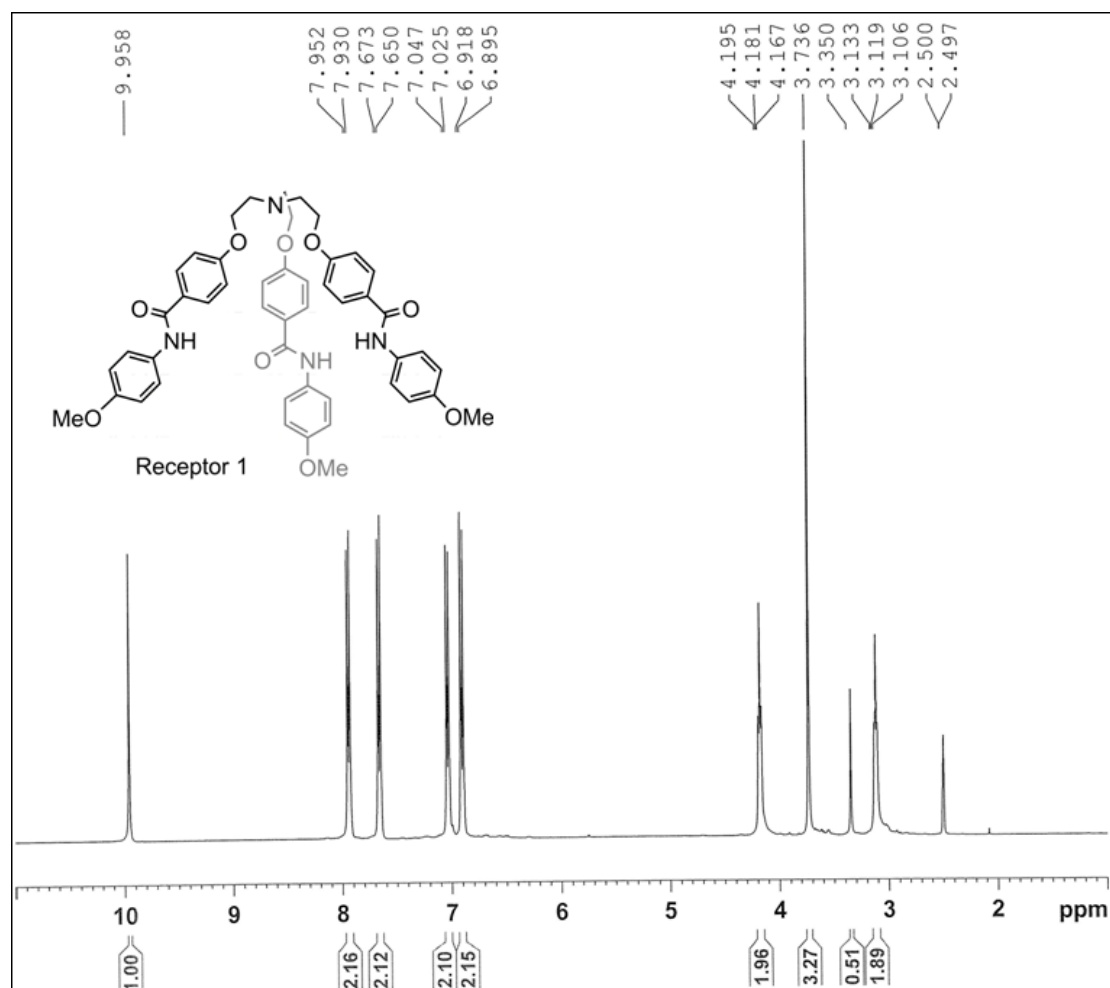

**Fig. S1**  $^1\text{H}$  NMR (400 MHz,  $\text{DMSO-}d_6$ , 20 °C) spectrum of receptor 1.

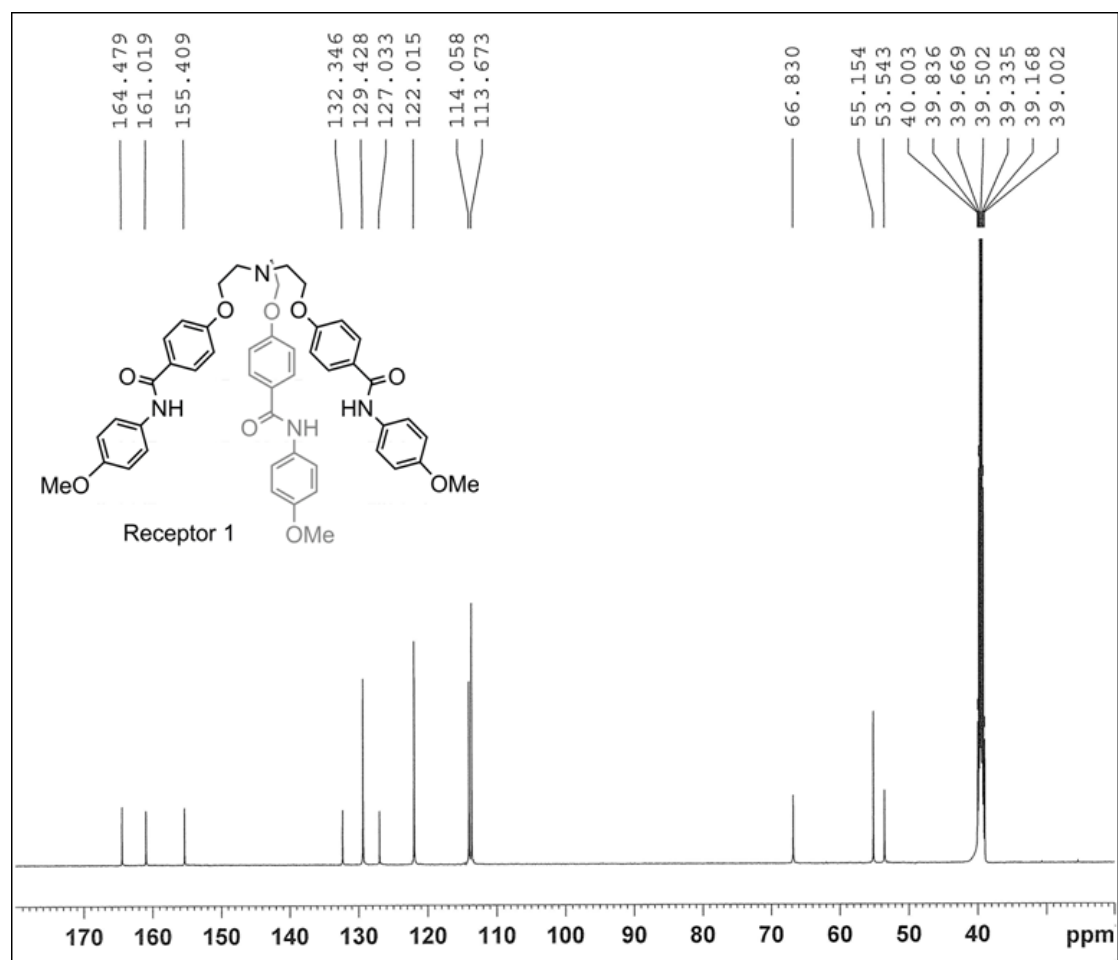

**Fig. S2**  $^{13}\text{C}$  NMR (100 MHz, DMSO- $d_6$ , 20 °C) spectrum of receptor 1.

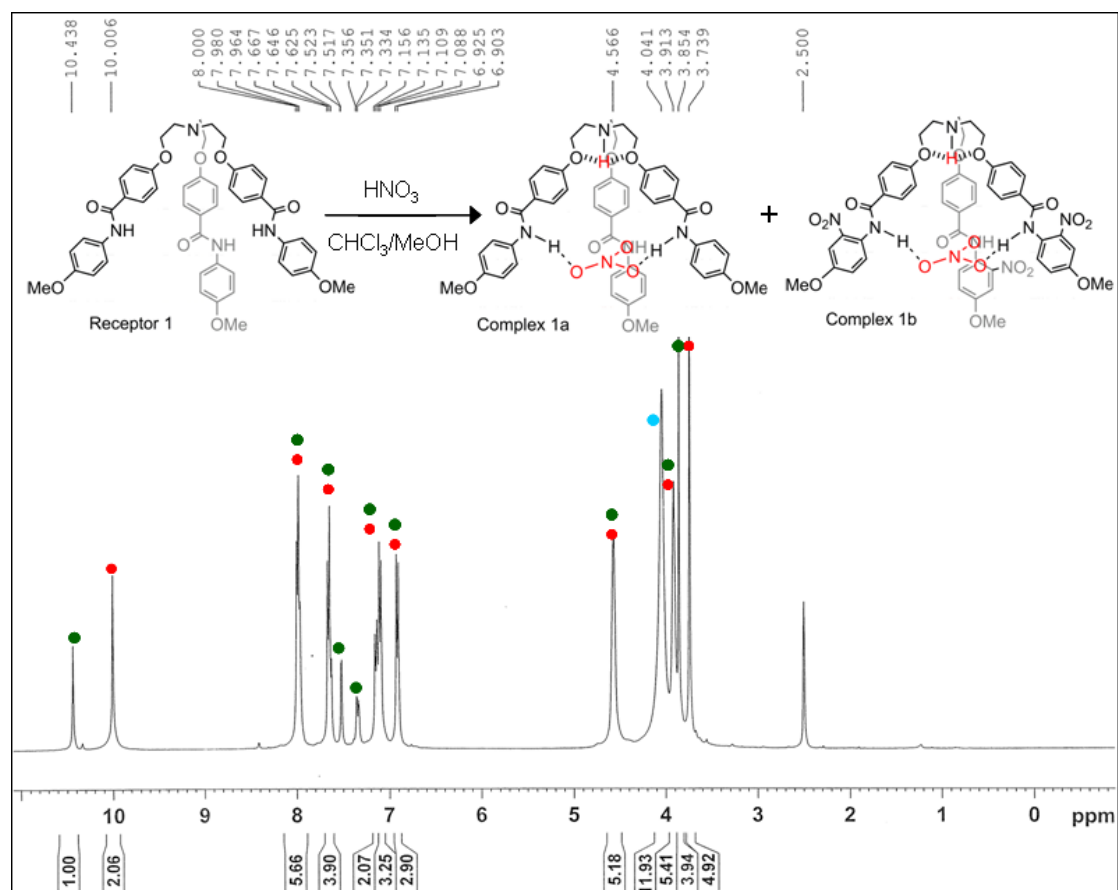

**Fig. S3** <sup>1</sup>H NMR (400 MHz, DMSO-*d*<sub>6</sub>, 20 °C) spectrum of mixture of complexes **1a** (represented by red circle) and **1b** (represented by green circle), obtained by treating compound **1** with nitric acid in CHCl<sub>3</sub>/MeOH (v/v) in ratio 1:1. The circle in blue color represents water peak from DMSO-*d*<sub>6</sub>.

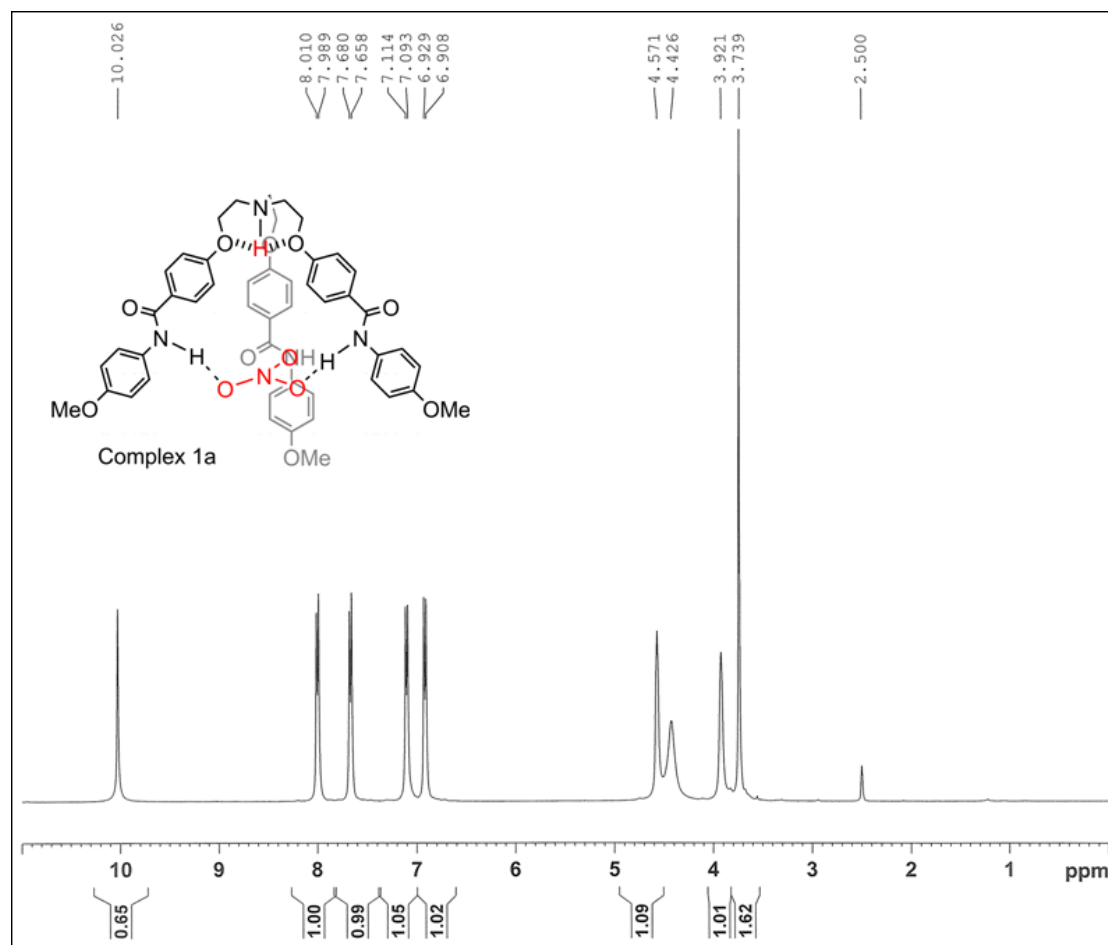

**Fig. S4**  $^1\text{H}$  NMR (400 MHz,  $\text{DMSO-}d_6$ , 20 °C) spectrum of nitrate complex **1a**.

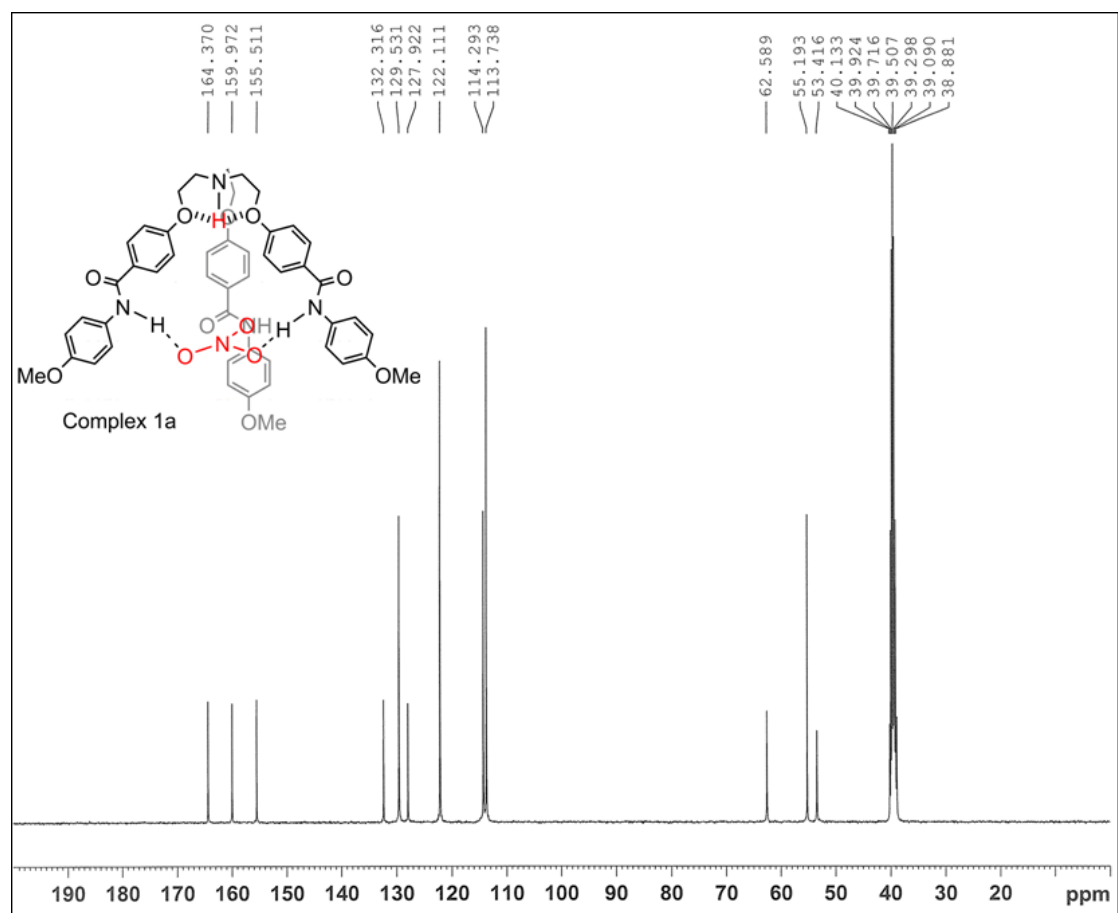

**Fig. S5**  $^{13}\text{C}$  NMR (100 MHz,  $\text{DMSO-}d_6$ , 20 °C) spectrum of nitrate complex **1a**.

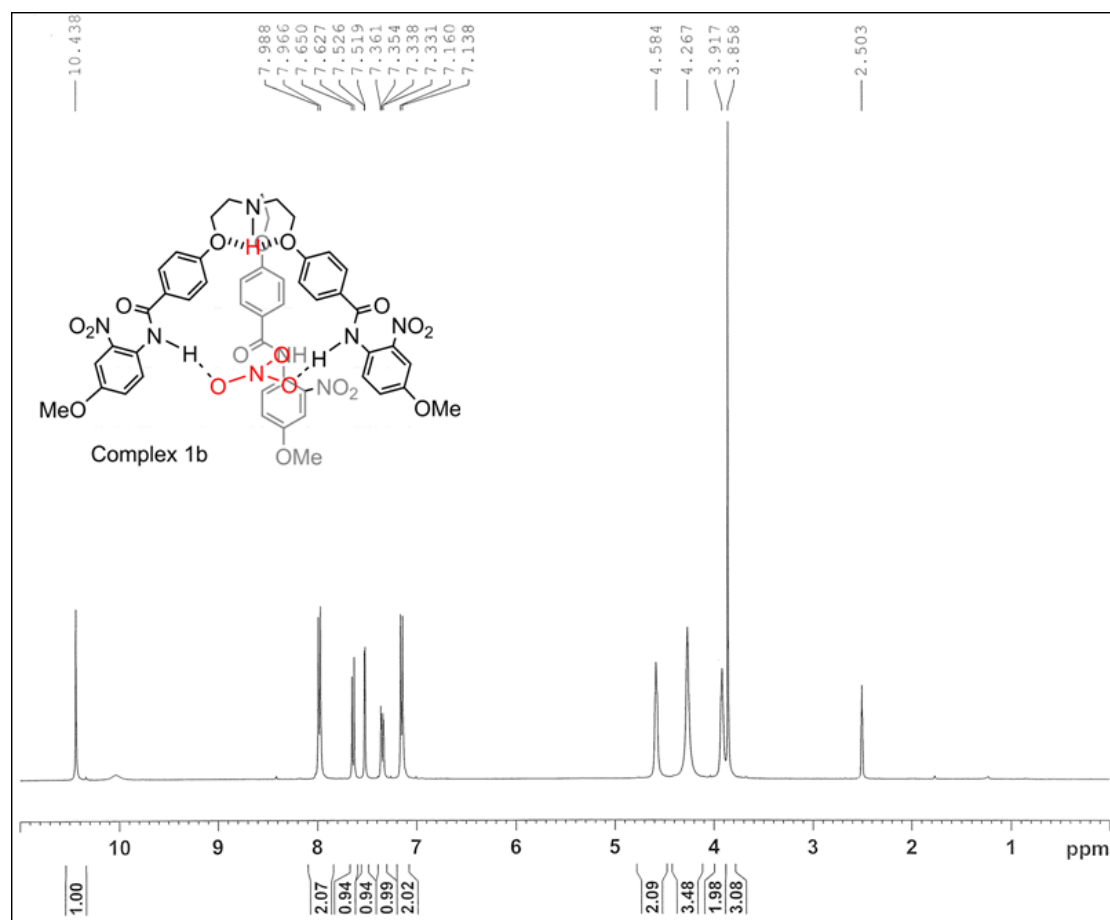

**Fig. S6**  $^1\text{H}$  NMR (400 MHz,  $\text{DMSO-}d_6$ , 20 °C) spectrum of nitrate complex **1b**.

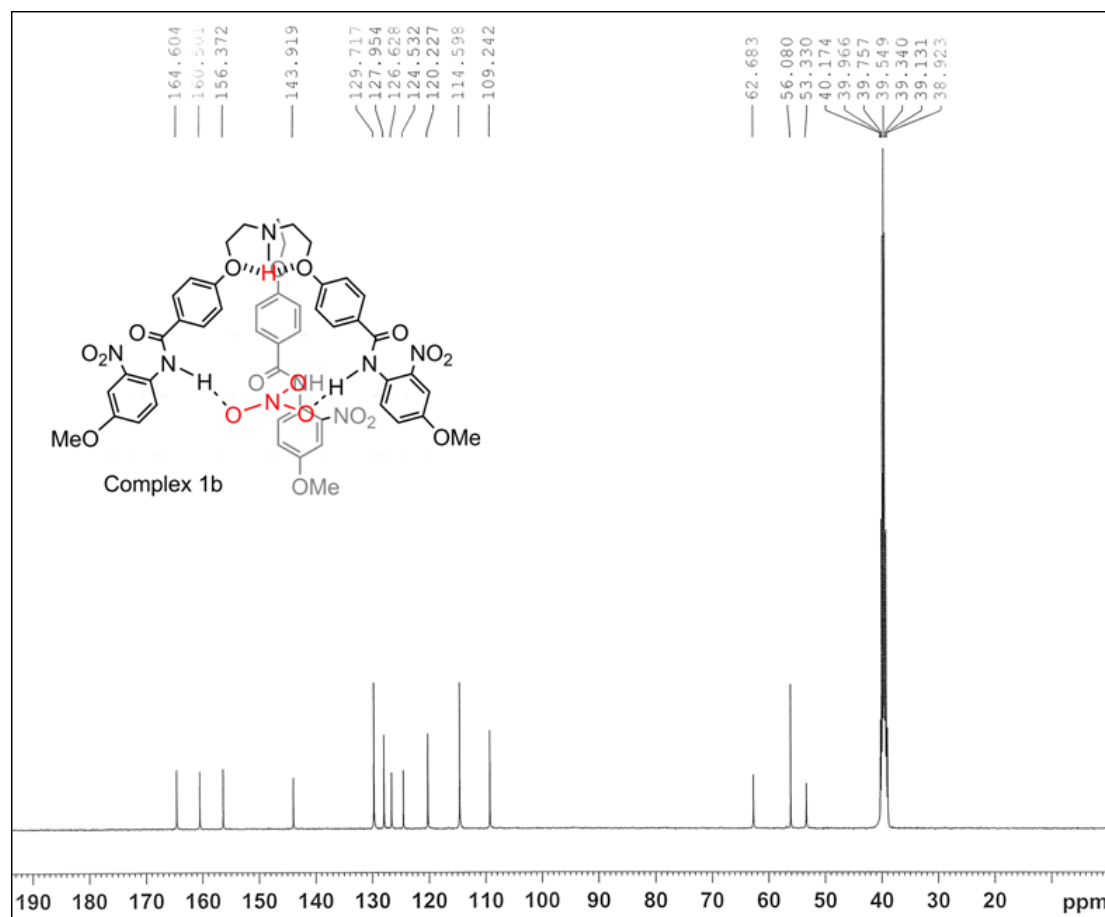

**Fig. S7**  $^{13}\text{C}$  NMR (100 MHz,  $\text{DMSO-}d_6$ , 20 °C) spectrum of nitrate complex **1b**.



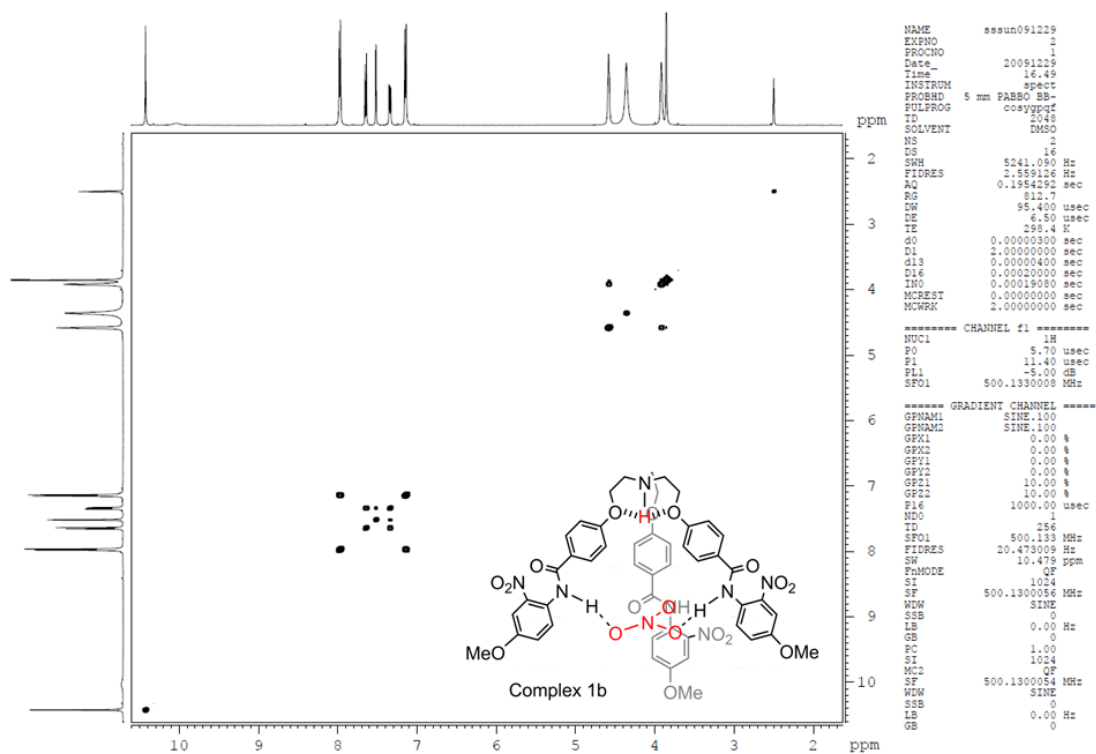

**Fig. S8** COSY spectra of nitrate complex **1b** in DMSO-*d*<sub>6</sub>.

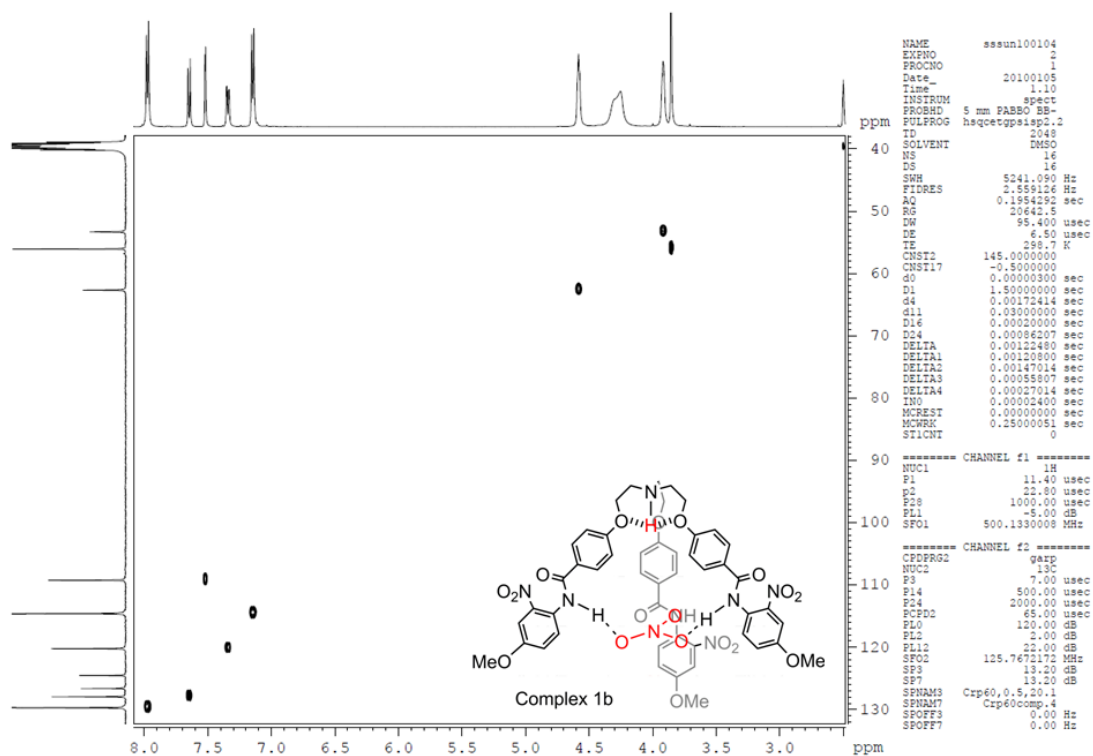

**Fig. S9** HSQC spectra of nitrate complex **1b** in DMSO-*d*<sub>6</sub>.

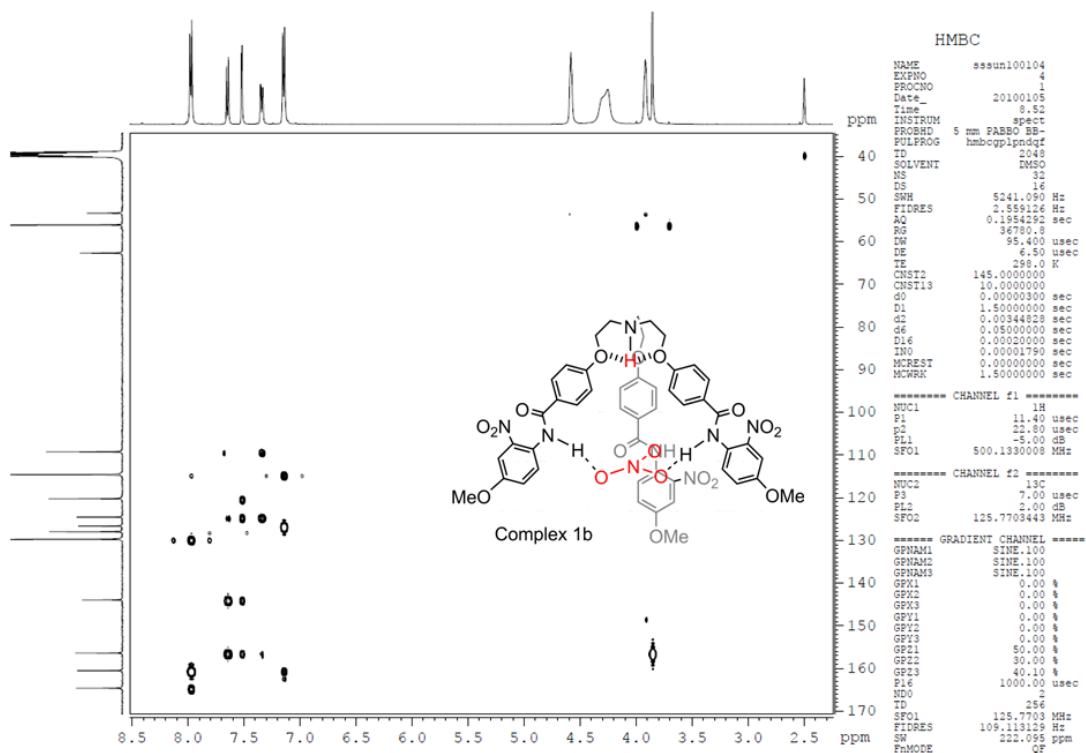

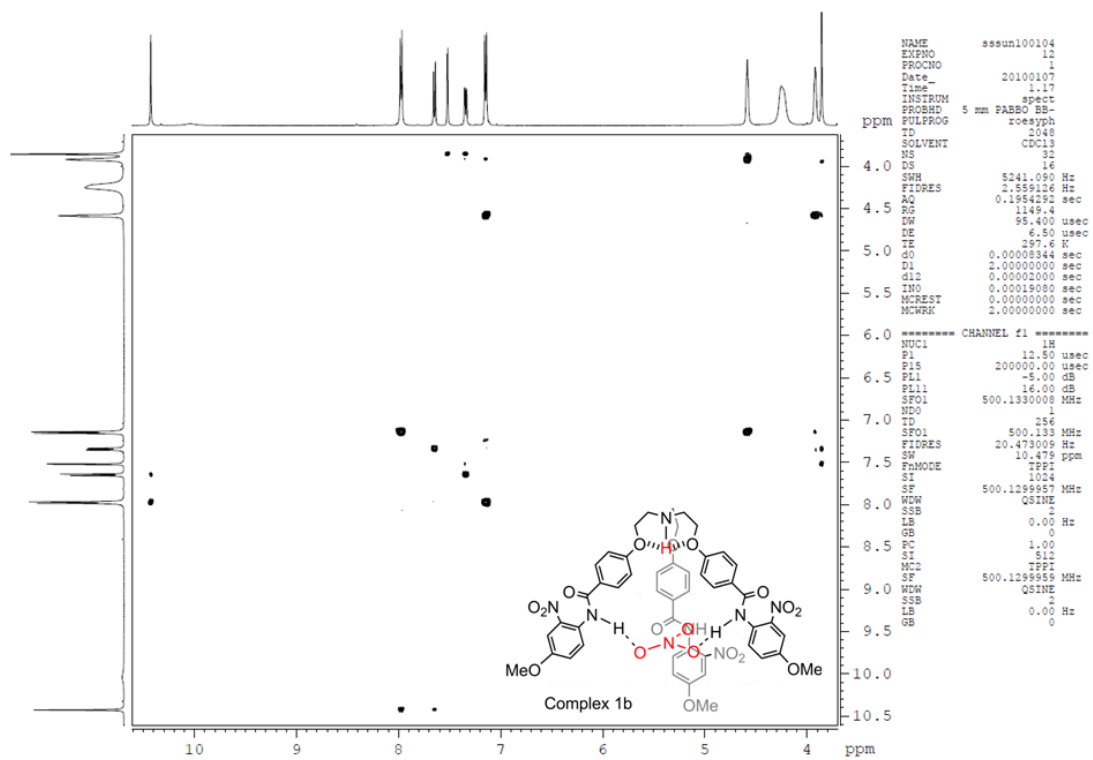

Fig. S11 ROESY spectra of nitrate complex **1b** in DMSO-*d*<sub>6</sub>.

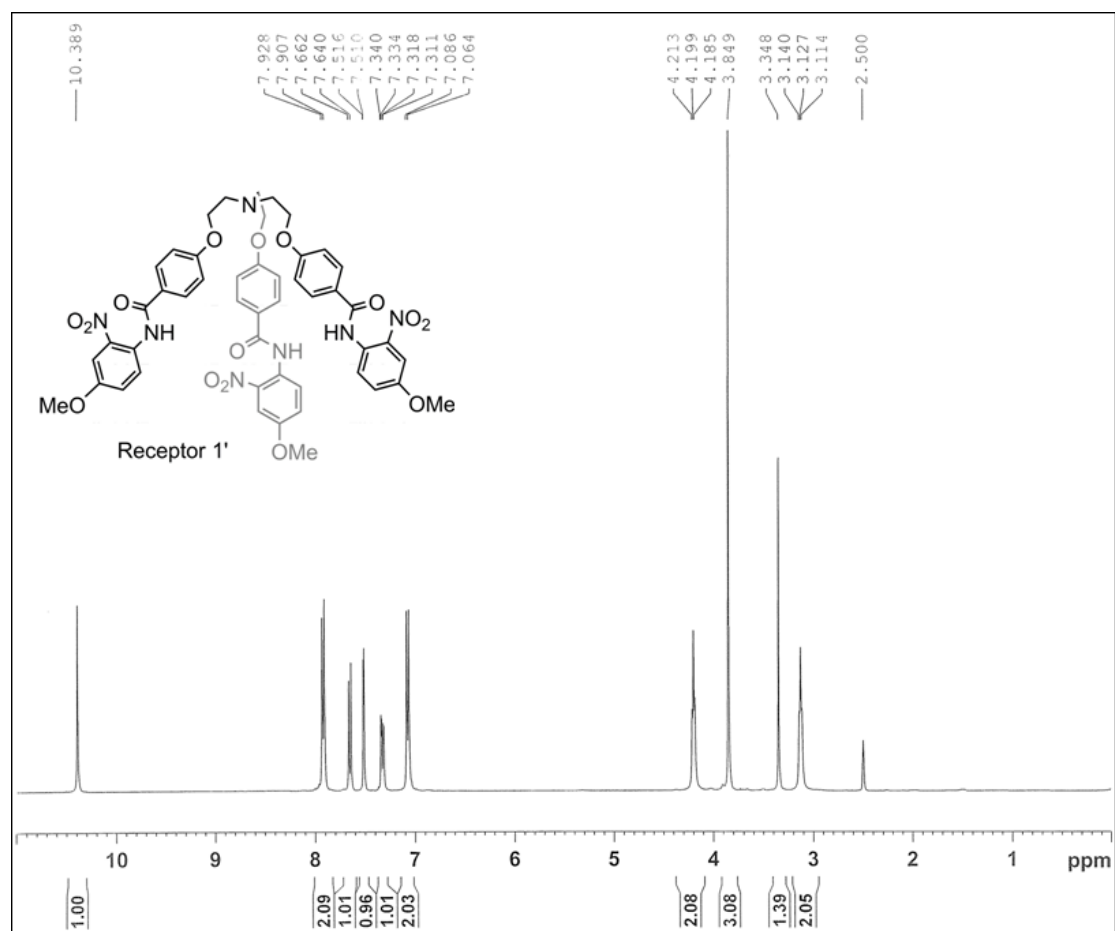

**Fig. S12** <sup>1</sup>H NMR (400 MHz, DMSO-*d*<sub>6</sub>, 20 °C) spectrum of substituted receptor 1'.

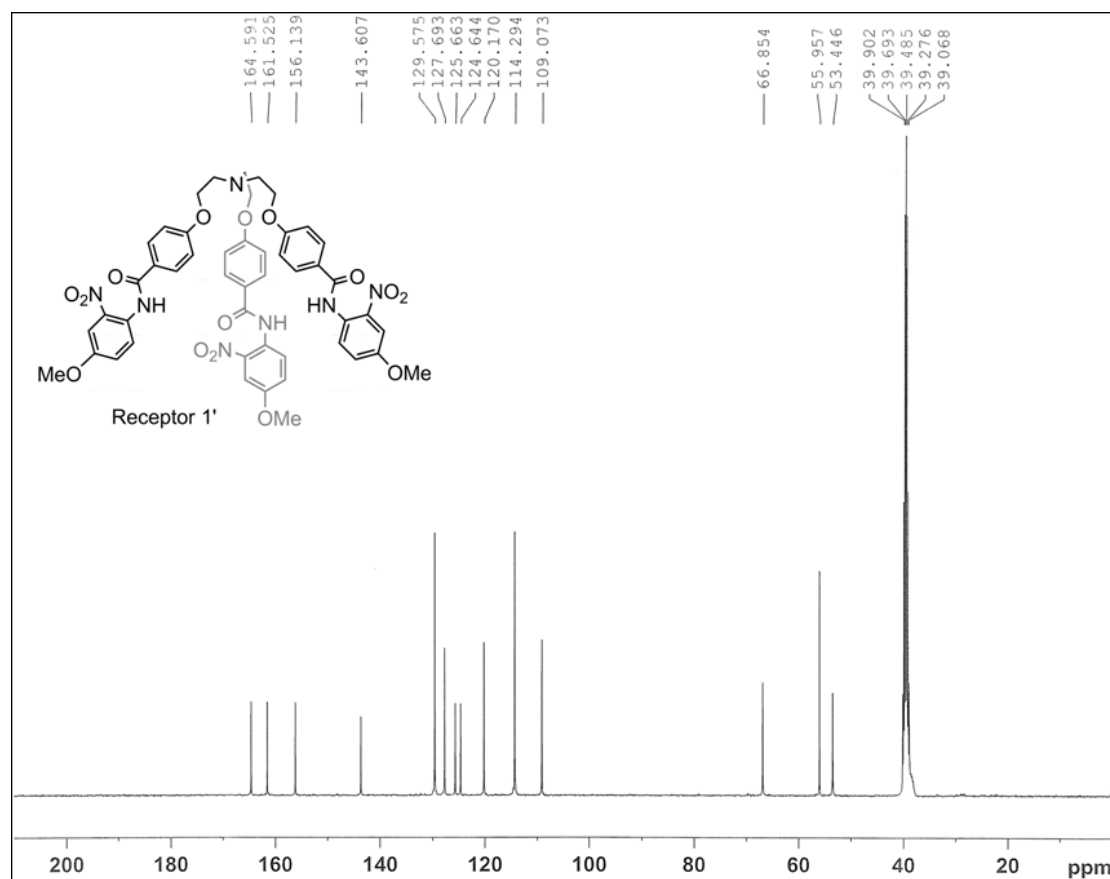

**Fig. S13** <sup>13</sup>C NMR (100 MHz, DMSO-*d*<sub>6</sub>, 20 °C) spectrum of substituted receptor 1'.

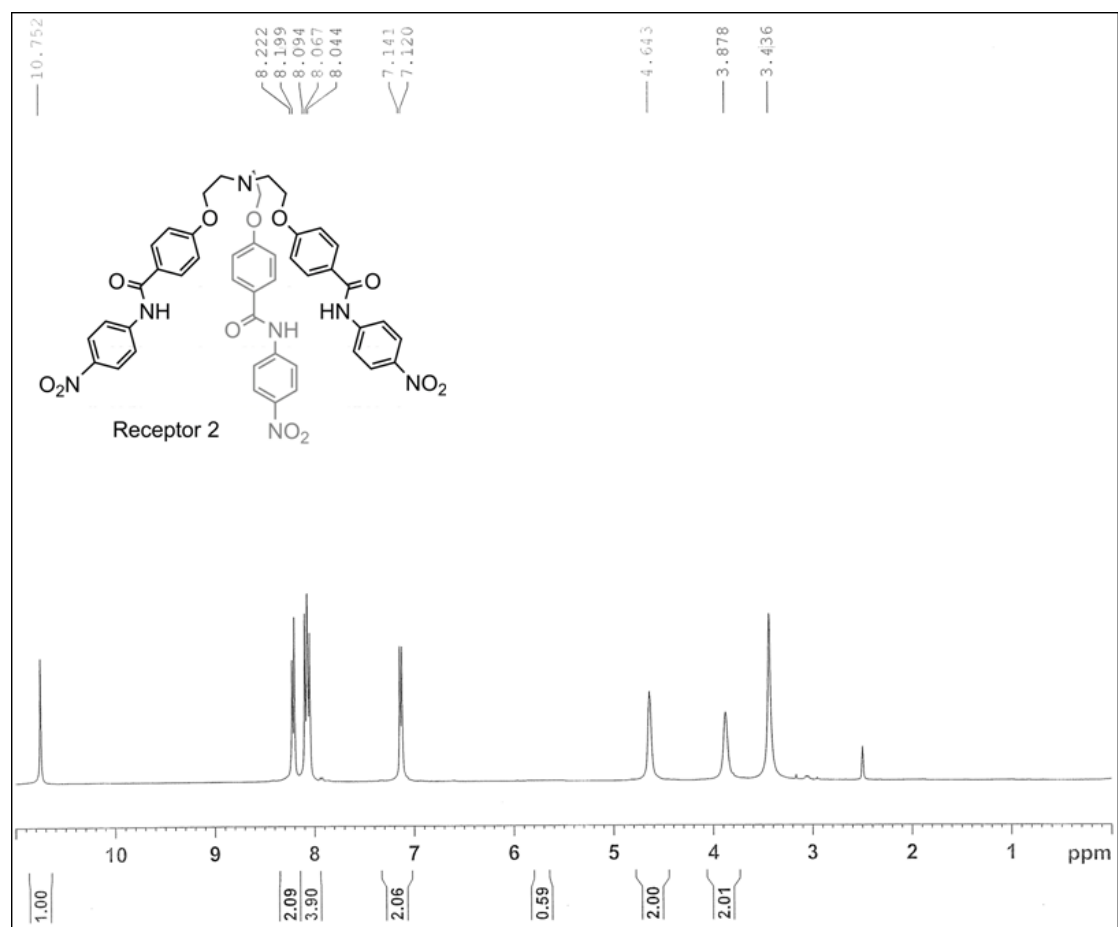

**Fig. S14**  $^1\text{H}$  NMR (400 MHz,  $\text{DMSO-}d_6$ , 20 °C) spectrum of receptor 2.

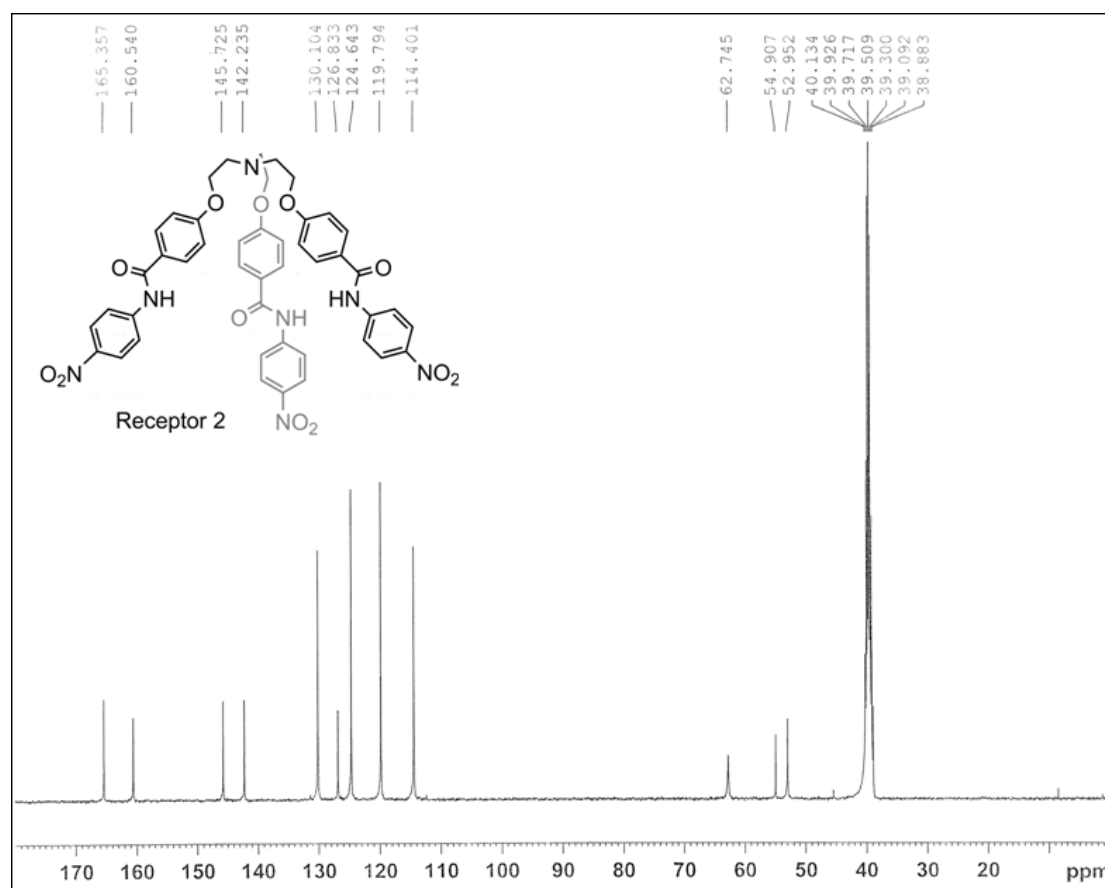

**Fig. S15**  $^{13}\text{C}$  NMR (100 MHz,  $\text{DMSO-}d_6$ , 20 °C) spectrum of receptor 2.



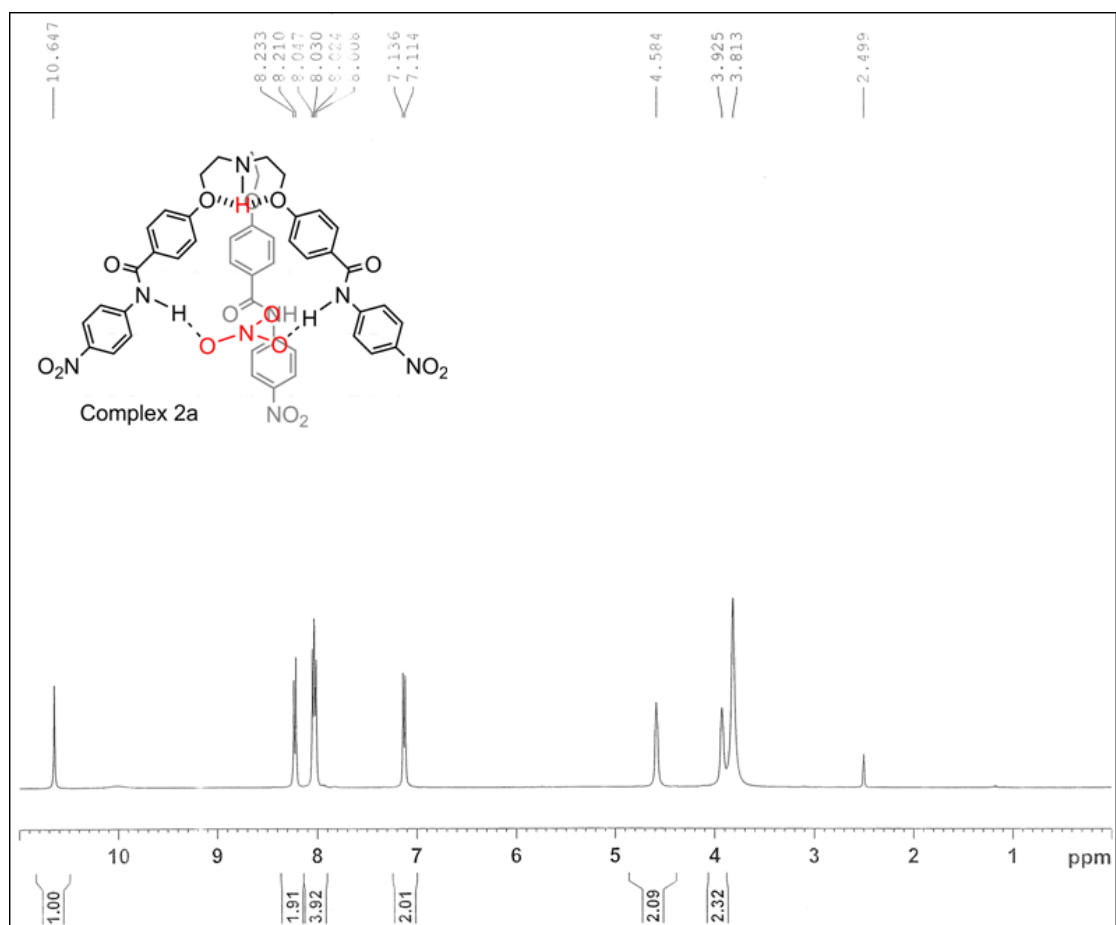

**Fig. S16**  $^1\text{H}$  NMR (400 MHz,  $\text{DMSO-}d_6$ , 20 °C) spectrum of nitrate complex **2a**.

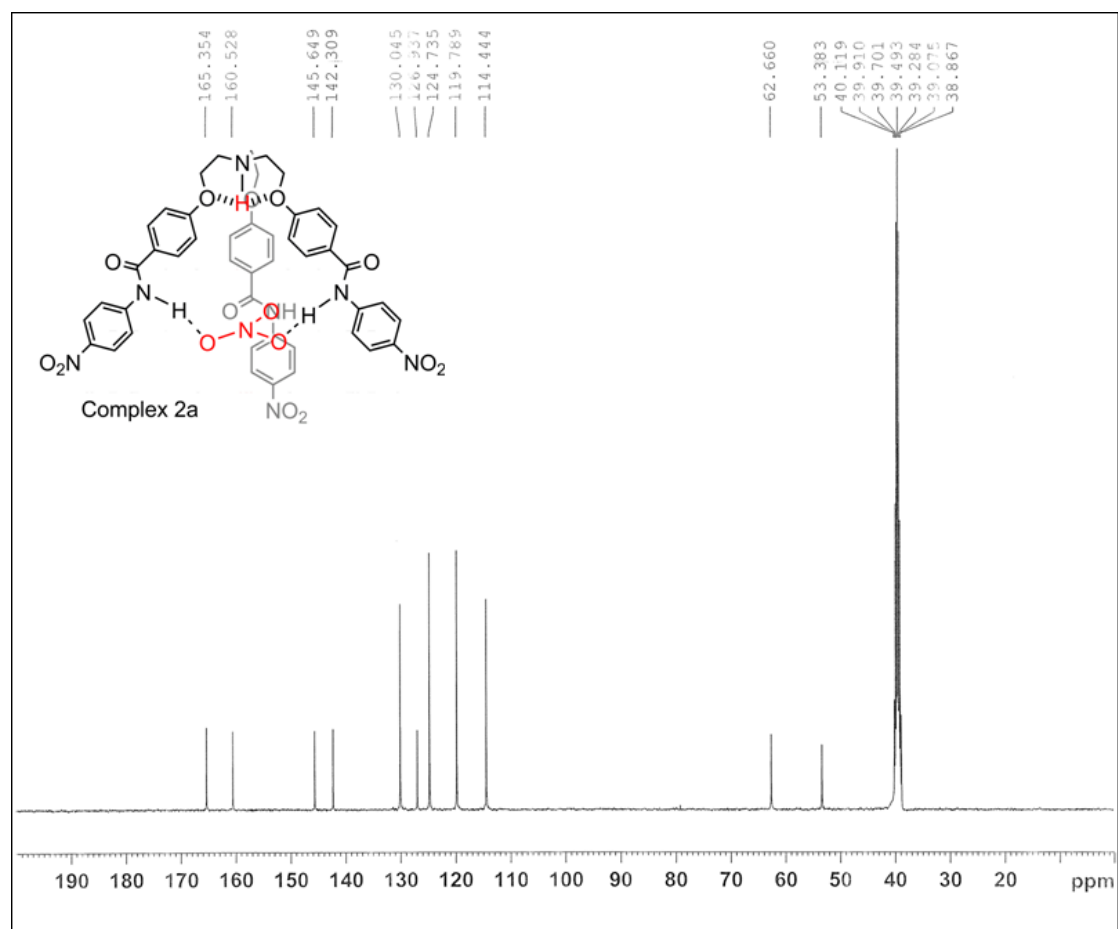

**Fig. S17**  $^{13}\text{C}$  NMR (100 MHz,  $\text{DMSO-}d_6$ , 20 °C) spectrum of nitrate complex **2a**.

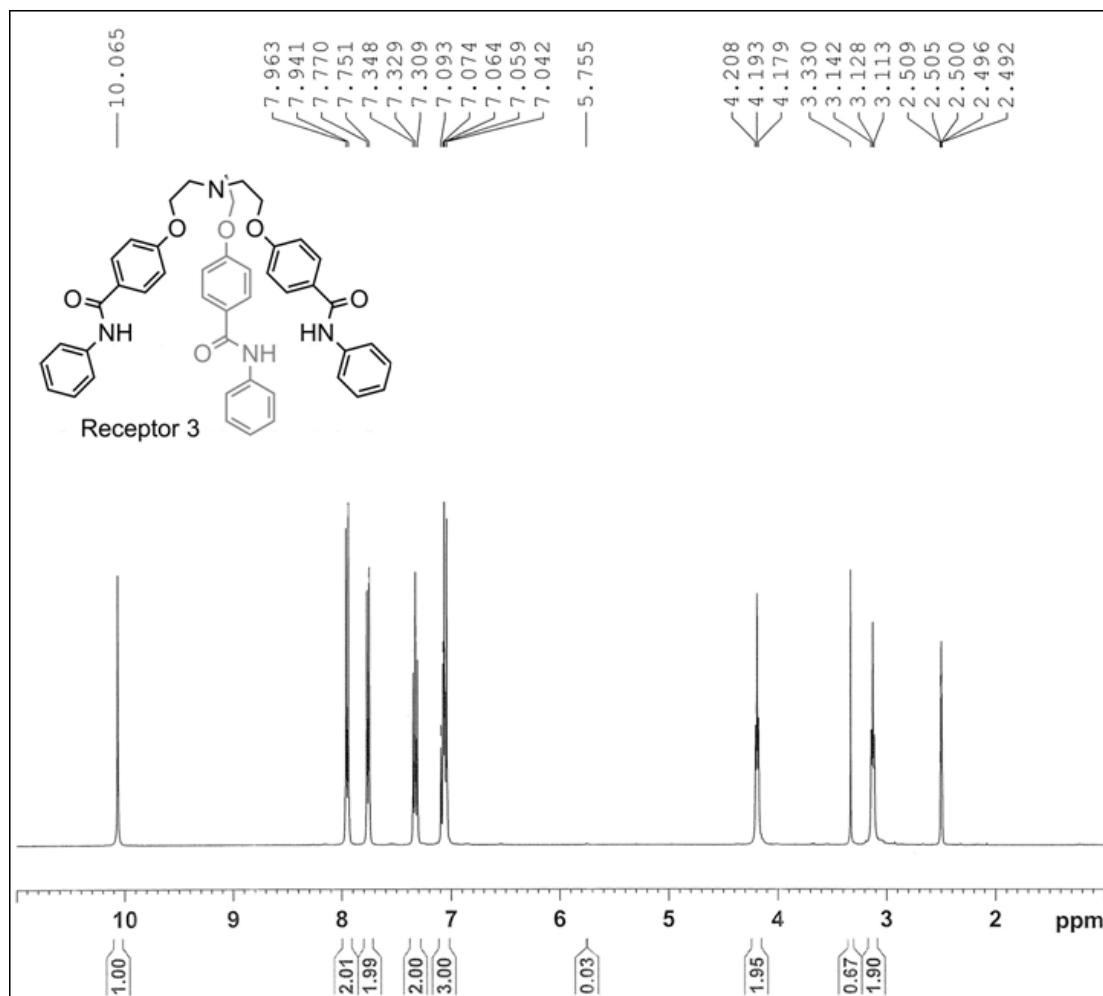

**Fig. S18**  $^1\text{H}$  NMR (400 MHz,  $\text{DMSO-}d_6$ , 20 °C) spectrum of receptor 3.

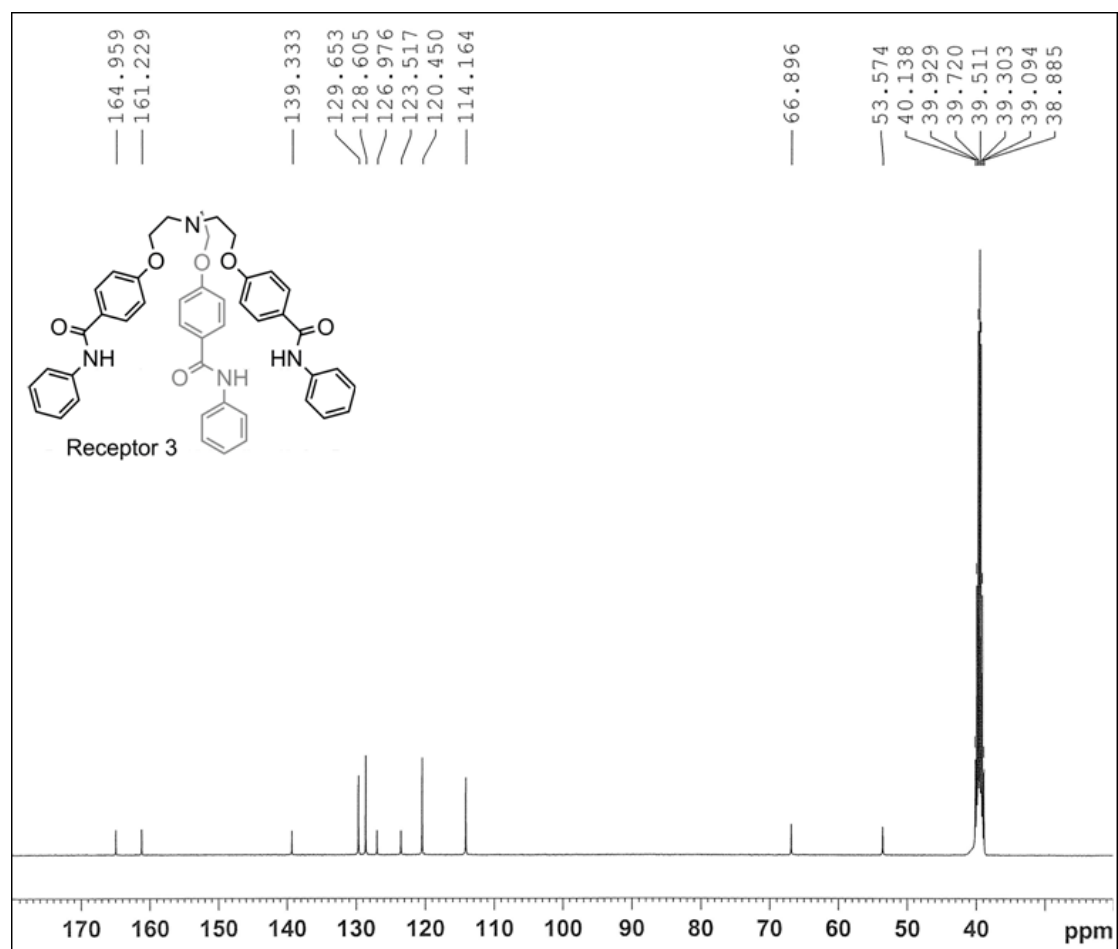

**Fig. S19**  $^{13}\text{C}$  NMR (100 MHz,  $\text{DMSO-}d_6$ , 20 °C) spectrum of receptor 3.

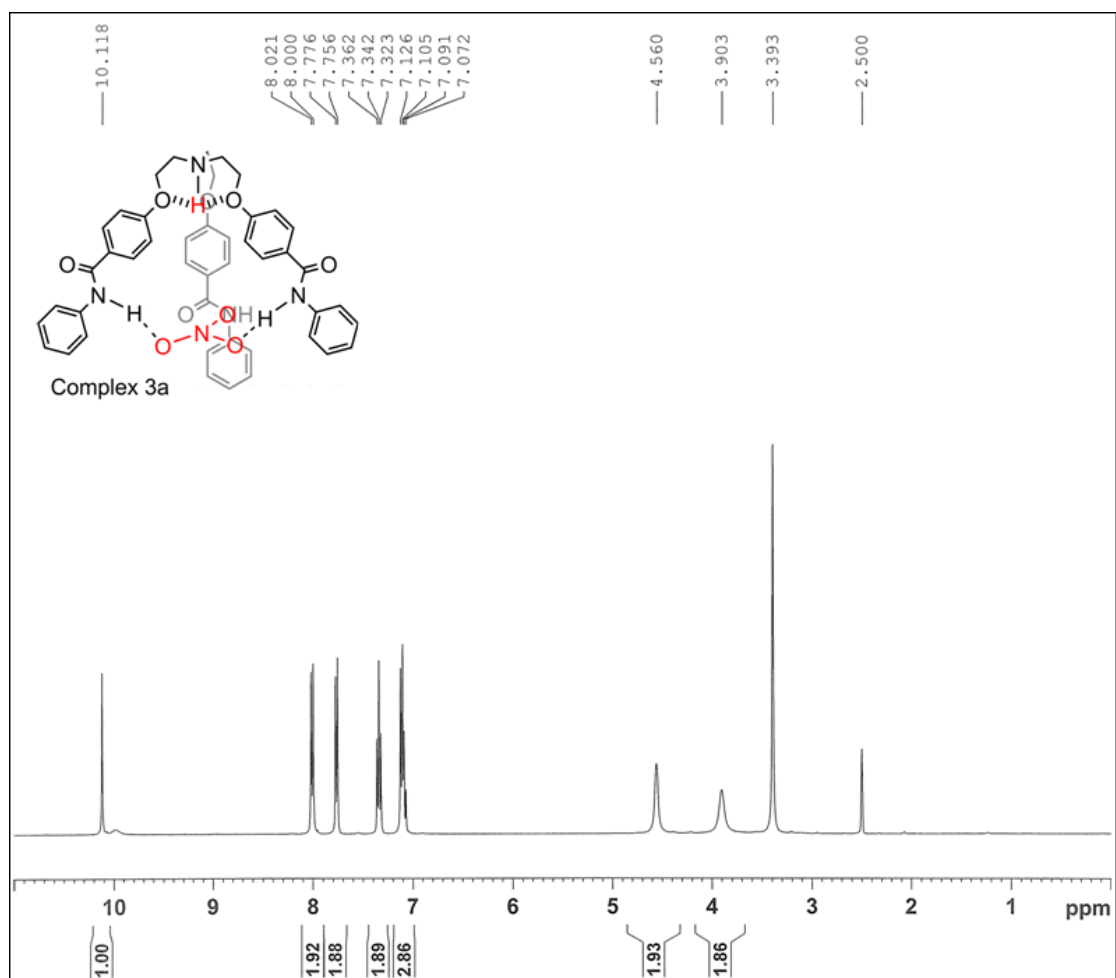

**Fig. S20**  $^1\text{H}$  NMR (400 MHz,  $\text{DMSO-}d_6$ , 20 °C) spectrum of nitrate complex **3a**.

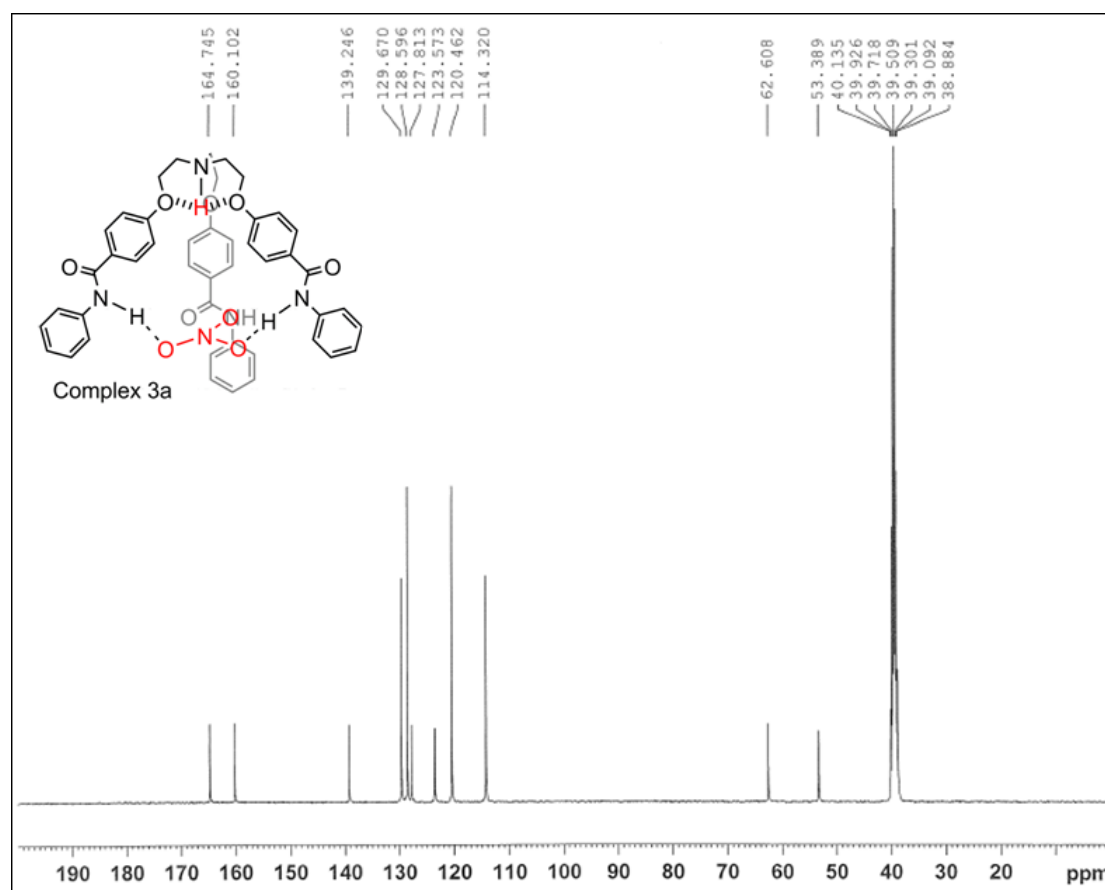

**Fig. S21**  $^{13}\text{C}$  NMR (100 MHz,  $\text{DMSO-}d_6$ , 20 °C) spectrum of nitrate complex **3a**.

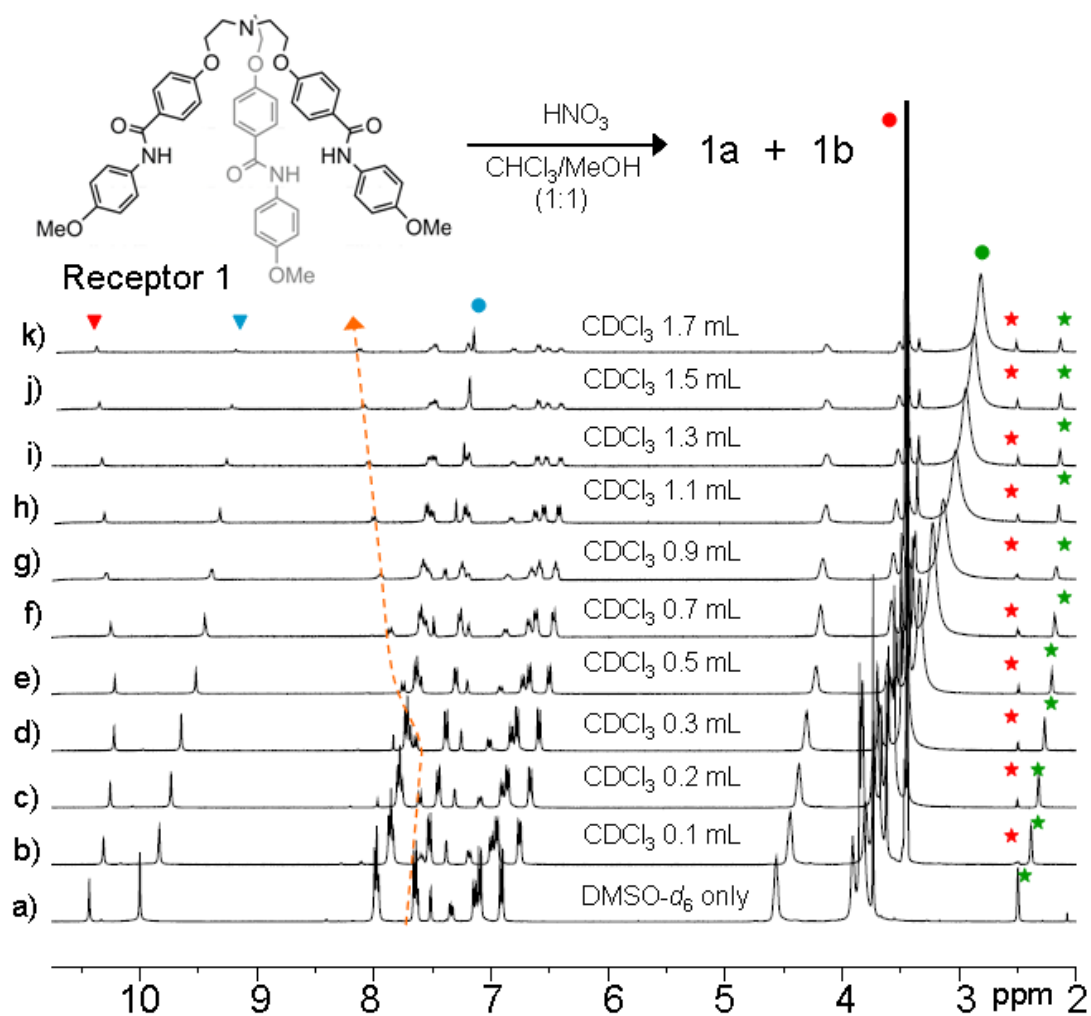

**Fig. S22** <sup>1</sup>H NMR titration spectra of nitrate complex (in DMSO-*d*<sub>6</sub> with varying amount of CDCl<sub>3</sub>), obtained after addition of nitric acid in aqueous methanol to suspension of receptor **1** in CHCl<sub>3</sub>. Star mark in green color represents peak corresponding to DMSO-*d*<sub>6</sub> (as solvent) and the same in red color represents for DMSO-*d*<sub>6</sub> (as internal reference). Circle in green color represents water peak from DMSO-*d*<sub>6</sub> (as solvent) and the same in red color represents water peak from DMSO-*d*<sub>6</sub> (as internal solvent). Triangle in red color represents amide N-H peak of nitrate complex **1b** and the same in blue color represents the same for complex **1a**. Circle in blue color represents peak for CDCl<sub>3</sub>.

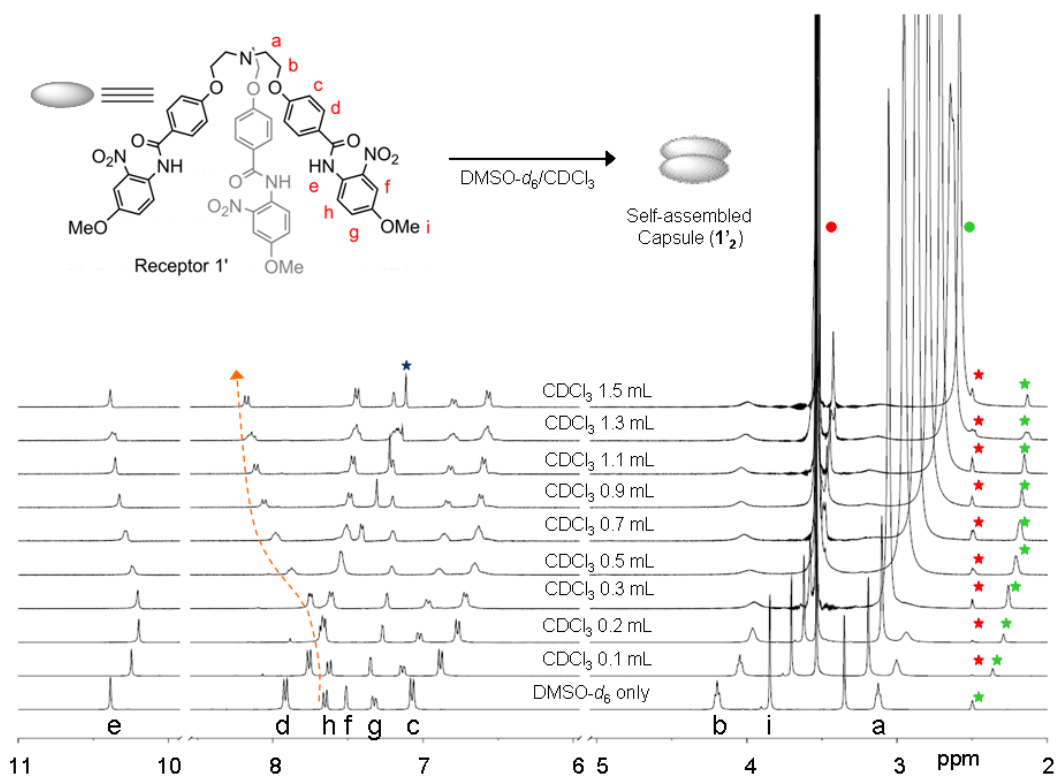

**Fig. S23**  $^1\text{H}$  NMR (400 MHz, 20 °C) titration spectra of receptor **1'** (52 mM) in a  $\text{DMSO-}d_6$  solution upon addition of varying amount of  $\text{CDCl}_3$  using TMS as the internal reference. The star marks in red, green, and blue color represent solvent peaks for  $\text{DMSO-}d_6$  from internal reference, solvent used to dissolve receptor **1'**, and  $\text{CDCl}_3$ , respectively. Circle in green color represents water peak from  $\text{DMSO-}d_6$  (as solvent) and the same in red color represents water peak from  $\text{DMSO-}d_6$  (as internal solvent).



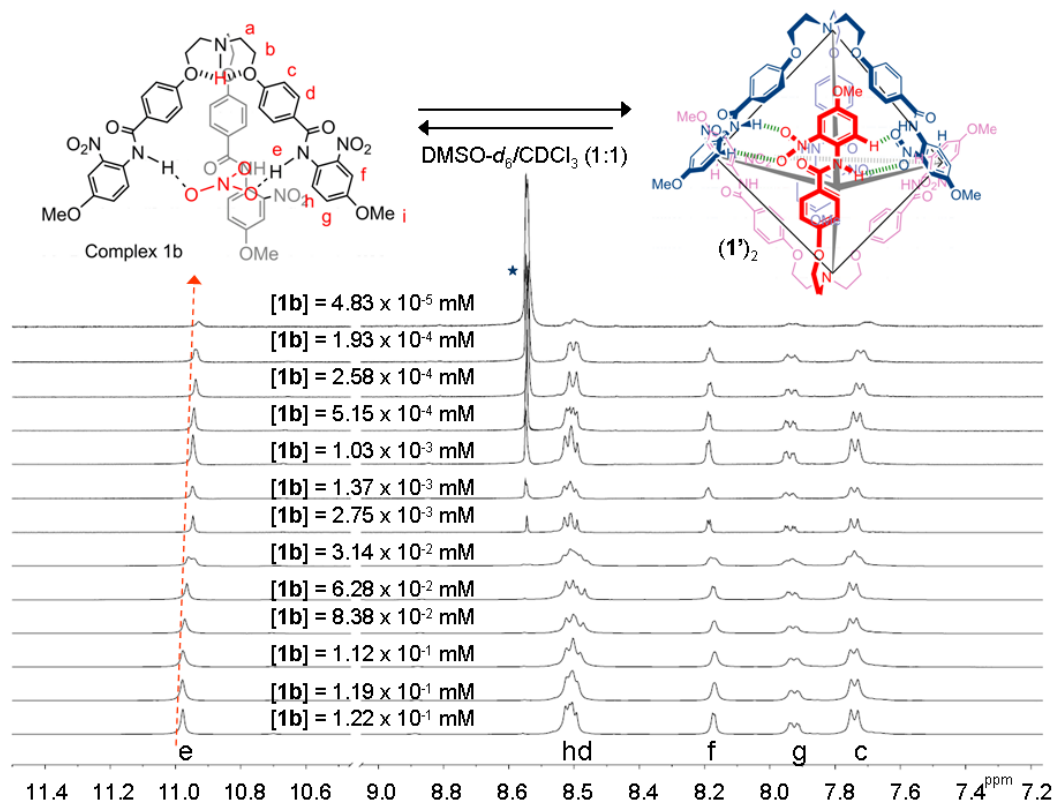

**Fig. S24** Concentration-dependent  $^1\text{H}$  NMR titration spectra of nitrate complex **1b** in a mixture solution of DMSO- $d_6$ /CDCl $_3$  (1:1). A star mark in blue color represents peak for CDCl $_3$ .



Elemental Composition Report

Single Mass Analysis

Tolerance = 10.0 PPM / DBE: min = -1.5, max = 1000.0  
 Element prediction: Off  
 Number of isotope peaks used for i-FIT = 2

Monoisotopic Mass: Even Electron Ions  
 9 formula(e) evaluated with 1 results within limits (up to 50 closest results for each mass)

Elements Used:

C: 0-1000 H: 0-4000 N: 8-8 O: 18-18

CK-163-4

1229\_CK-163-4 29 (2.896)

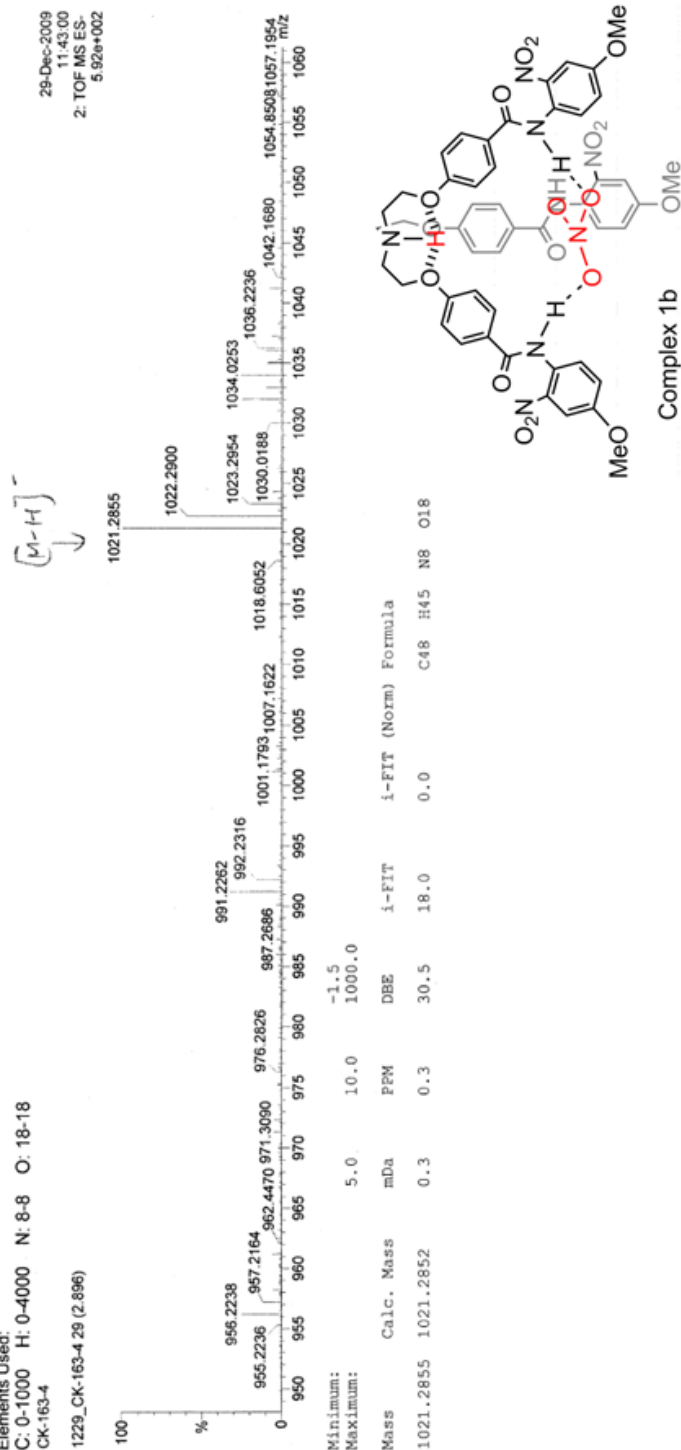

For [M-H]<sup>-</sup>: 1021.9137

Theoretical value for [M-H]<sup>-</sup>: 1021.2852 (100%)

Fig. S26 HRESI mass spectrum of complex **1b** recorded in DMSO.

Elemental Composition Report

Single Mass Analysis  
 Tolerance = 100.0 PPM / DBE: min = -1.5, max = 1000.0  
 Element prediction: Off  
 Number of isotope peaks used for i-FIT = 2

Monoisotopic Mass, Even Electron Ions  
 18 formula(e) evaluated with 1 results within limits (up to 50 closest results for each mass)  
 Elements Used:  
 C: 0-1000 H: 0-4000 N: 7-8 O: 15-15  
 CK-195

0224\_CK-195\_2 60 (3.202)

25-Feb-2010  
 14:04:58  
 1: TOF MS ES-  
 1.69e+003

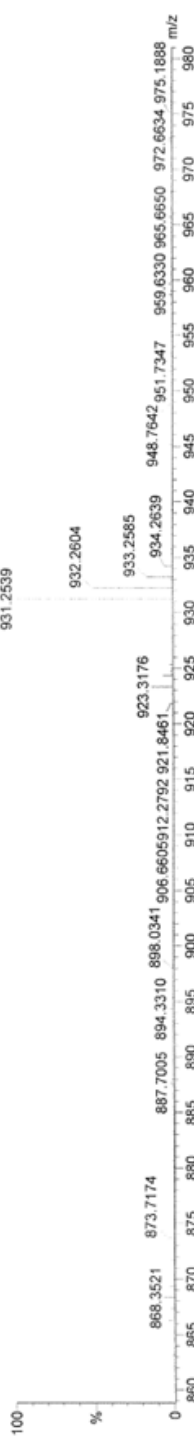

| Mass     | Calc. Mass | mDa | PPM | DBE  | i-FIT | i-FIT (Norm) | Formula        |
|----------|------------|-----|-----|------|-------|--------------|----------------|
| 931.2539 | 931.2535   | 0.4 | 0.4 | 30.5 | 25.7  | 0.0          | C45 H39 N8 O15 |

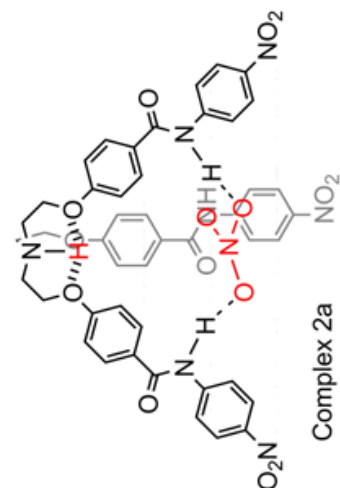

Chemical Formula: C<sub>45</sub>H<sub>40</sub>N<sub>8</sub>O<sub>15</sub>  
 Molecular Weight: 932.8437

For [M-H]<sup>-</sup>: 931.8358

Theoretical value for [M-H]<sup>-</sup>: 931.2535 (100%)

Fig. S27 HRESI mass spectrum of complex 2a recorded in DMSO.

Elemental Composition Report

Single Mass Analysis

Tolerance = 20.0 PPM / DBE: min = -1.5, max = 1000.0  
 Element prediction: Off  
 Number of isotope peaks used for i-FIT = 2

Monoisotopic Mass, Even Electron Ions  
 8 formula(e) evaluated with 1 results within limits (up to 50 closest results for each mass)

Elements Used:

C: 0-1000 H: 0-4000 N: 5-5 O: 9-9

CK-122-2

1118\_CK-122-2 13 (1.327) Cm (13-1)

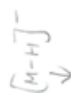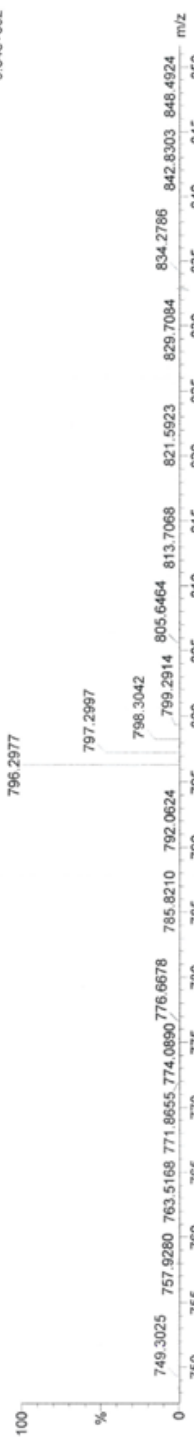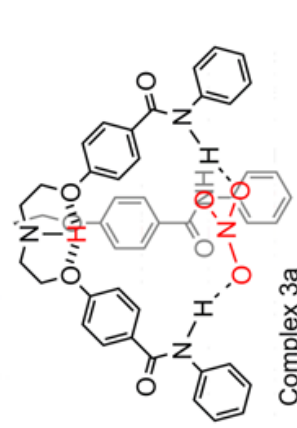

Chemical Formula: C<sub>45</sub>H<sub>43</sub>N<sub>5</sub>O<sub>9</sub>  
 Molecular Weight: 797.8510

For [M-H]<sup>-</sup>: 796.8431

Theoretical value for [M-H]<sup>-</sup>: 796.2983 (100%)

Fig. S28 HRESI mass spectrum of complex 3a recorded in DMSO.

Elemental Composition Report

Single Mass Analysis

Tolerance = 10.0 PPM / DBE: min = -1.5, max = 1000.0  
 Element prediction: Off  
 Number of isotope peaks used for i-FIT = 2

Monoisotopic Mass: Even Electron Ions

17 formula(e) evaluated with 1 results within limits (up to 50 closest results for each mass)

Elements Used:

C: 0-1000 H: 0-4000 N: 14-14 O: 30-30

CK-165-2

1229\_CK-165-2 8 (0.737)

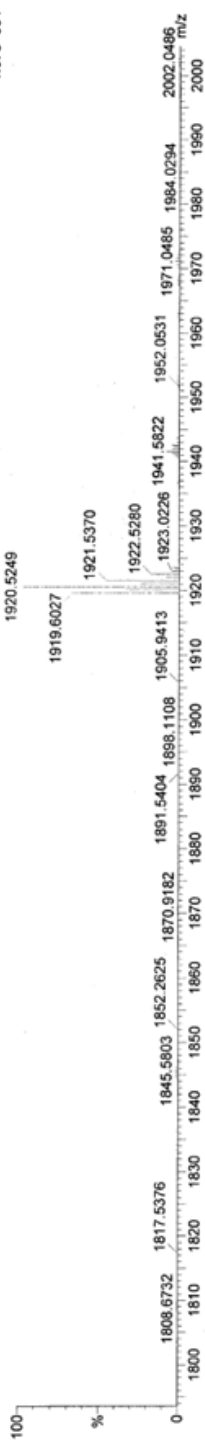

Minimum: -1.5  
 Maximum: 1000.0

| Mass      | Calc. Mass | mDa | PFM | DBE  | i-FIT | i-FIT (Norm) | Formula                                                         |
|-----------|------------|-----|-----|------|-------|--------------|-----------------------------------------------------------------|
| 1919.6027 | 1919.6026  | 0.1 | 0.1 | 58.5 | 59.1  | 0.0          | C <sub>96</sub> H <sub>91</sub> N <sub>14</sub> O <sub>30</sub> |

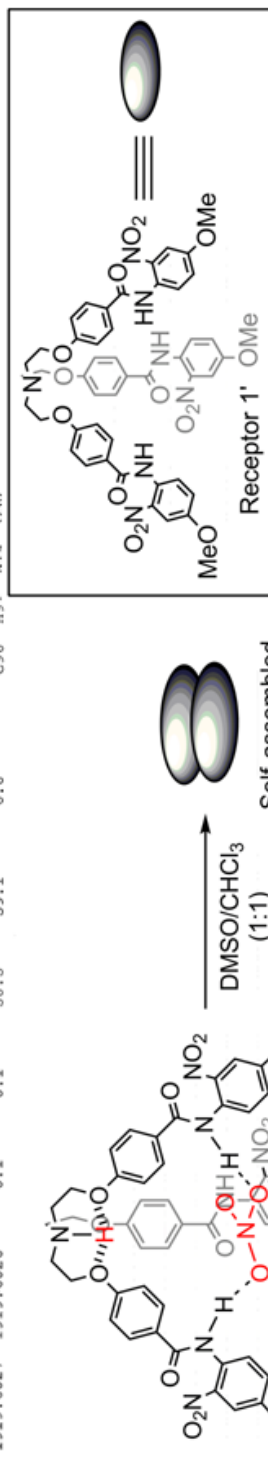

Fig. S29 HRESI mass spectrum of self-assembled capsule (1'2) recorded after dissolving nitrate complex 1b in mixture solution of DMSO/CHCl<sub>3</sub> (1:1).

Elemental Composition Report

Single Mass Analysis

Tolerance = 10.0 PPM / DBE: min = -1.5, max = 1000.0  
 Element prediction: Off  
 Number of isotope peaks used for i-FIT = 2

Monoisotopic Mass, Odd and Even Electron Ions  
 17 formula(e) evaluated with 1 results within limits (up to 50 closest results for each mass)  
 Elements Used:

C: 0-1000 H: 0-4000 N: 15-15 O: 33-33

CX-50-1

0420\_CX-50-1\_2 (0.228)

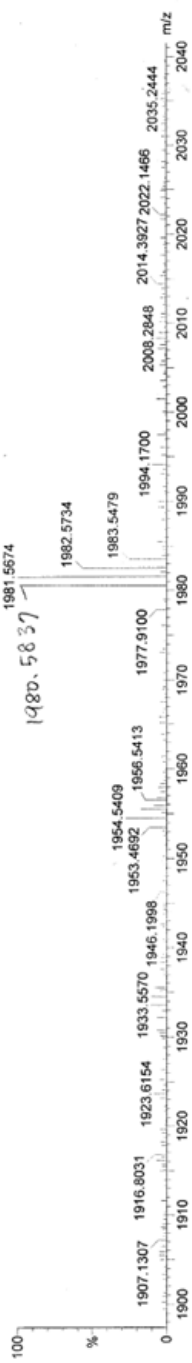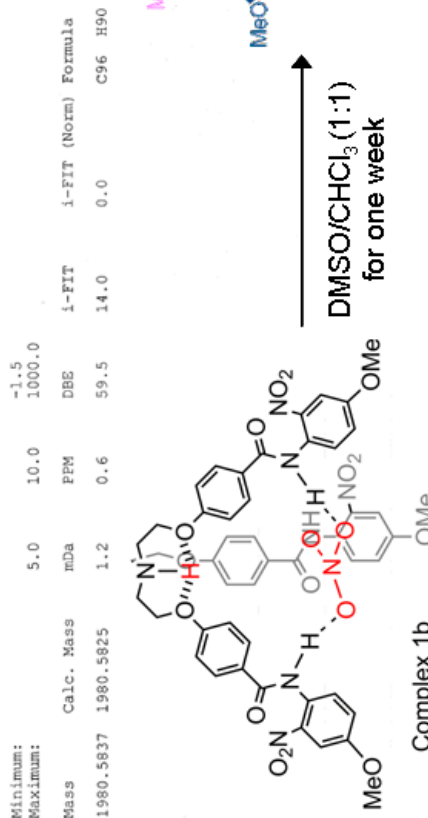

Molecular Formula: C<sub>96</sub>H<sub>91</sub>N<sub>15</sub>O<sub>33</sub>  
 Molecular Weight: 1982.8304  
 Molecular Weight for [M-H]<sup>-</sup>: 1981.8225  
 Theoretical value: 1981.5859 (100%)

**Fig. S30** HRESI mass spectrum of self-assembled capsule encapsulating nitrate anion (**1'2a**) recorded after dissolving nitrate complex **1b** in mixture solution of DMSO/CHCl<sub>3</sub> (1:1) and keeping the mixture solution at room temperature (25 °C) over a period of one week.

**Table S1.** Crystallographic data and structure refinements for **1a**

|                                    | <b>1a</b>                                                      |
|------------------------------------|----------------------------------------------------------------|
| Empirical formula                  | C <sub>48</sub> H <sub>49</sub> N <sub>5</sub> O <sub>12</sub> |
| Formula weight                     | 887.92                                                         |
| Crystal system                     | Trigonal                                                       |
| Space group                        | P -3                                                           |
| a (Å)                              | 15.7160(5)                                                     |
| b (Å)                              | 15.7160(5)                                                     |
| c (Å)                              | 11.4490(5)                                                     |
| α (°)                              | 90                                                             |
| β (°)                              | 90                                                             |
| γ (°)                              | 120                                                            |
| V (Å <sup>3</sup> )                | 2448.96(15)                                                    |
| Z                                  | 2                                                              |
| Temperature                        | 200(2) K                                                       |
| Wavelength (Å)                     | 0.71073                                                        |
| ρ <sub>cal</sub> Mg/m <sup>3</sup> | 1.204                                                          |
| μ, mm <sup>-1</sup>                | 0.087                                                          |
| F (000)                            | 936                                                            |
| Independent reflection             | 2845                                                           |
| Reflection used                    | 13438                                                          |
| R <sub>int</sub> value             | 0.1221                                                         |
| Refinement method                  | Full-matrix least-squares on F <sup>2</sup>                    |
| GOOF                               | 1.837                                                          |
| R indices[I > 2σ(I)]               | R1 = 0.1953, wR2 = 0.5241                                      |
| R indices(all data)                | R1 = 0.2508, wR2 = 0.5372                                      |

**Table S2.** Hydrogen bonding distances (Å) and Bond angles (°) in complex **1a**

| Bond distances (Å) |       | Bond angles (°) |        |
|--------------------|-------|-----------------|--------|
| N1-H1'...N3        | 6.821 | N1-H1'...N3     | 180.00 |
| N2-H2...O3         | 2.215 | N2-H2...O3      | 157.25 |
| C7-H7...O3         | 2.476 | C7-H7...O3      | 158.25 |
| C1-H1A...O3        | 2.630 | C1-H1A...O3     | 147.10 |
| C11-H11...O3       | 2.674 | C11-H11...O3    | 137.10 |



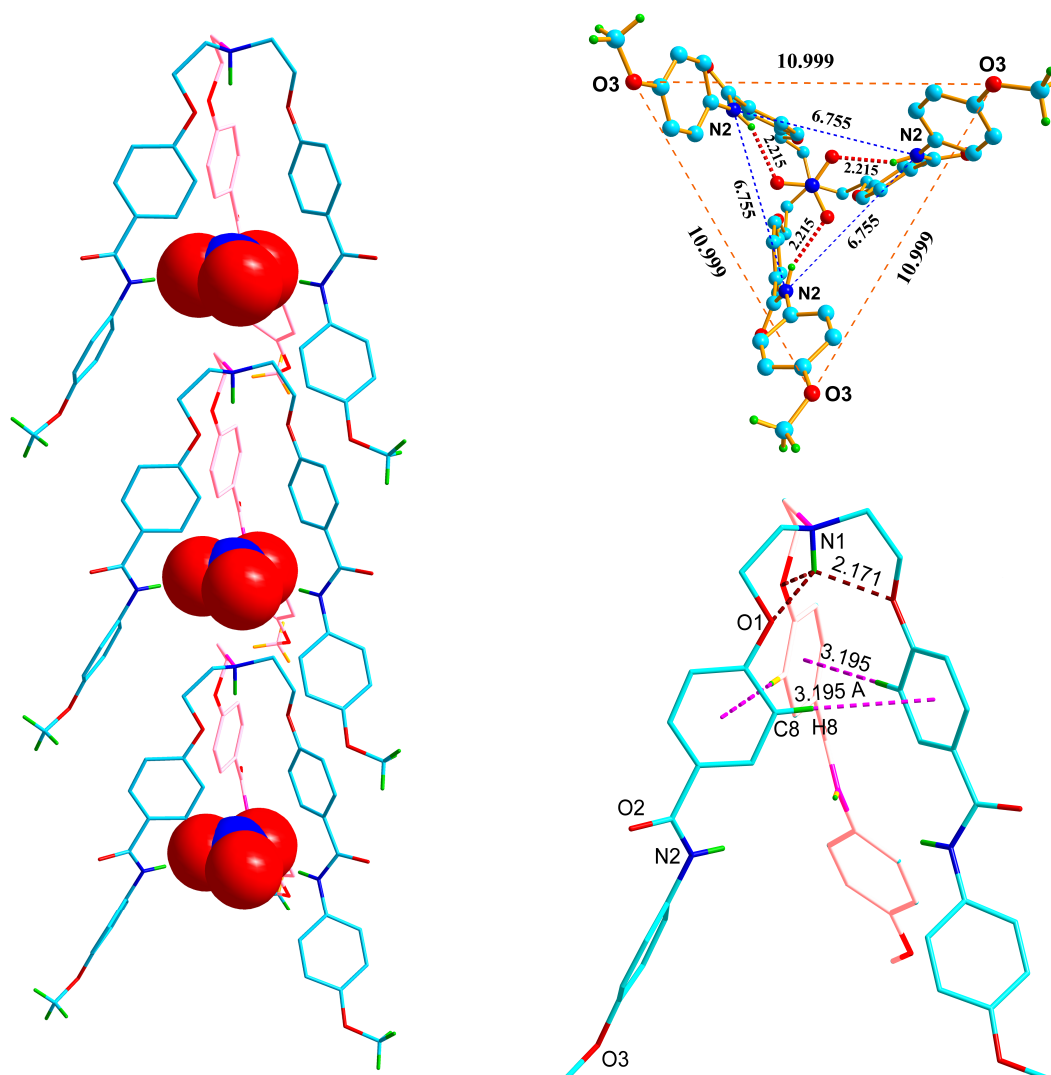

**Fig. S31** Crystal structure of nitrate complex **1a** showing: packing of discrete nitrate complex (left); end of each arm lie at the apex of equilateral triangle (right, top); and interior cavity formed (right, bottom) by hydrogen bonding interactions between proton of centrally bridged N-atom and O-atoms of aliphatic arm (shown by brown color dotted lines) and aromatic C-H $\cdots$  $\pi$  interactions (shown by purple color dotted lines) respectively.

**Reference:**

1. A. S. Singh, B.-Y. Chen, Y.-S. Wen, C. Tsai and S.-S. Sun, *Org. Lett.* 2009, **11**, 1867-1870.
